# Supplementary material for: A Comparative Genome-Wide Transcriptome Analysis of Glucocorticoid Responder and Non-Responder Primary Human Trabecular Meshwork Cells
Source: MDPI journal article supplement (doi:10.3390/genes13050882), 2022-05-15
Supplement: s1 [file s1]

**Supplementary Table S1a:** Characteristics of Human Donor Eyes Used for the Present Study

| DEX Treatment<br>(nM) | Code      | Age | Sex | Cause of<br>Death      | Time B/W<br>Death &<br>Enucleation<br>(h) | Time B/W<br>Enucleation &<br>Culture (h) | Experiment<br>Eye | HOCAS/ Culture | Treatment | Remarks                |
|-----------------------|-----------|-----|-----|------------------------|-------------------------------------------|------------------------------------------|-------------------|----------------|-----------|------------------------|
| 100nM (N=16)          | OCHD18-29 | 76  | F   | Natural                | 0.45                                      | 30.5                                     | OD                | HOCAS          | DEX       | Data included          |
|                       |           |     |     |                        |                                           |                                          | OS                | Cell culture   | ETH/DEX   | TM Culture established |
|                       | OCHD18-49 | 48  | M   | Heart Disease          | 2.5                                       | 30.66                                    | OD                | HOCAS          | DEX       | Data included          |
|                       |           |     |     |                        |                                           |                                          | OS                | Cell culture   | ETH/DEX   | TM Culture established |
|                       | OCHD18-52 | 55  | F   | Vascular<br>accident   | 2.75                                      | 67.91                                    | OD                | HOCAS          | DEX       | Data included          |
|                       |           |     |     |                        |                                           |                                          | OS                | Cell culture   | ETH/DEX   | TM Culture established |
|                       | OCHD18-53 | 67  | M   | Diabetes               | 4.33                                      | 27                                       | OD                | HOCAS          | DEX       | Data included          |
|                       |           |     |     |                        |                                           |                                          | OS                | Cell culture   | ETH/DEX   | TM Culture established |
|                       | OCHD18-56 | 82  | M   | Cardiac arrest         | 4                                         | 23                                       | OD                | HOCAS          | DEX       | Data included          |
|                       |           |     |     |                        |                                           |                                          | OS                | Cell culture   | ETH/DEX   | TM Culture established |
|                       | OCHD18-57 | 80  | F   | Respiratory<br>disease | 3                                         | 28.5                                     | OD                | HOCAS          | DEX       | Data included          |
|                       |           |     |     |                        |                                           |                                          | OS                | Cell culture   | ETH/DEX   | TM Culture established |
|                       | OCHD19-01 | 73  | M   | Natural                | 4.5                                       | 30.8                                     | OD                | HOCAS          | DEX       | Data included          |
|                       |           |     |     |                        |                                           |                                          | OS                | Cell culture   | ETH/DEX   | TM Culture established |
|                       | OCHD19-02 | 66  | M   | Road traffic<br>injury | 2.75                                      | 8.33                                     | OD                | HOCAS          | DEX       | Data included          |
|                       |           |     |     |                        |                                           |                                          | OS                | Cell culture   | ETH/DEX   | TM Culture established |
|                       | OCHD19-03 | 65  | F   | Heart Disease          | 5.8                                       | 47.33                                    | OD                | HOCAS          | DEX       | Data included          |
|                       |           |     |     |                        |                                           |                                          | OS                | Cell culture   | ETH/DEX   | TM Culture established |
|                       | OCHD19-04 | 72  | M   | Heart Disease          | 3.5                                       | 41                                       | OD                | HOCAS          | DEX       | Data included          |
|                       |           |     |     |                        |                                           |                                          | OS                | Cell culture   | ETH/DEX   | TM Culture established |
|                       | OCHD20-04 | 65  | M   | Chronic<br>obstructive | 0.33                                      | 28.5                                     | OD                | HOCAS          | DEX       | Data included          |
|                       |           |     |     |                        |                                           |                                          | OS                | Cell culture   | ETH/DEX   | TM Culture established |

|                                  |    |   |                        |      |       |    |              |         |                        |
|----------------------------------|----|---|------------------------|------|-------|----|--------------|---------|------------------------|
| pulmonary disease                |    |   |                        |      |       |    |              |         |                        |
| OCHD20-05                        | 50 | M | Kidney failure         | 2    | 71.58 | OD | HOCAS        | DEX     | Data included          |
|                                  |    |   |                        |      |       | OS | Cell culture | ETH/DEX | TM Culture established |
| OCHD20-06                        | 59 | M | Chronic Kidney Disease | 0.5  | 29.16 | OD | HOCAS        | DEX     | Data included          |
|                                  |    |   |                        |      |       | OS | Cell culture | ETH/DEX | TM Culture established |
| OCHD20-09                        | 46 | M | Accidental fall        | 2.25 | 31    | OD | HOCAS        | DEX     | Data included          |
|                                  |    |   |                        |      |       | OS | Cell culture | ETH/DEX | TM Culture established |
| OCHD20-10                        | 38 | M | Chronic Kidney Disease | 1.41 | 47.5  | OD | HOCAS        | DEX     | Data included          |
|                                  |    |   |                        |      |       | OS | Cell culture | ETH/DEX | TM Culture established |
| OCHD20-14                        | 56 | M | Heart Disease          | 3.91 | 72.25 | OD | HOCAS        | DEX     | Data included          |
|                                  |    |   |                        |      |       | OS | Cell culture | ETH/DEX | TM Culture established |
| HTM Cell used for RNA-Sequencing |    |   |                        |      |       |    |              |         |                        |
| OCHD18-39                        | 82 | F | Respiratory disease    | 0.75 | -     | OS | Cell culture | ETH/DEX | TM Culture established |

A total of 16 paired eyes were used for the study with the mean ( $\pm$ ) SD age was  $62.38 \pm 12.82$  years. The mean ( $\pm$ ) SD elapsed time between (b/w) death and enucleation was  $2.75 \pm 1.58$  h and the mean elapsed time between enucleation and culture was  $38.44 \pm 18.39$  h. DEX- Eyes treated with dexamethasone; ETH/DEX- HTM Cells treated with either 0.1% ethanol or dexamethasone. \* HTM Cells used for RNA-sequencing.

**Supplementary Table S1b:** Trabecular Meshwork Cells Used for the RNA Sequence

| <b>R/NR</b> | <b>Code</b> | <b>Experiment<br/>Eye</b> | <b>Treatment</b> | <b>RAN Seq</b> |
|-------------|-------------|---------------------------|------------------|----------------|
| <b>R</b>    | OCHD18-39   | OS                        | ETH (0.1%)       | Yes            |
|             |             |                           | DEX (100nM)      | Yes            |
|             | OCHD18-53   | OS                        | ETH (0.1%)       | Yes            |
|             |             |                           | DEX (100nM)      | Yes            |
|             | OCHD19-03   | OS                        | ETH (0.1%)       | Yes            |
|             |             |                           | DEX (100nM)      | Yes            |
|             | OCHD19-04   | OS                        | ETH (0.1%)       | Yes            |
|             |             |                           | DEX (100nM)      | Yes            |
|             | OCHD18-29   | OS                        | ETH (0.1%)       | Yes            |
|             |             |                           | DEX (100nM)      | Yes            |
| <b>NR</b>   | OCHD18-52   | OS                        | ETH (0.1%)       | Yes            |
|             |             |                           | DEX (100nM)      | Yes            |
|             | OCHD18-56   | OS                        | ETH (0.1%)       | Yes            |
|             |             |                           | DEX (100nM)      | Yes            |
|             | OCHD19-02   | OS                        | ETH (0.1%)       | Yes            |
|             |             |                           | DEX (100nM)      | Yes            |

Note: Responder; NR- Non-responder

**Supplementary Table S2.** List of Genes Selected from RNA Sequencing for Validation by RT<sup>2</sup>- PCR Array

| S.No | Ref seq   | Symbol         | Description                                                               |
|------|-----------|----------------|---------------------------------------------------------------------------|
| 1    | NM_000681 | <i>ADRA2A</i>  | Adrenergic, alpha-2A-, receptor                                           |
| 2    | NM_004673 | <i>ANGPTL1</i> | Angiopoietin-like 1                                                       |
| 3    | NM_001647 | <i>APOD</i>    | Apolipoprotein D                                                          |
| 4    | NM_031911 | <i>CIQTNF7</i> | C1q and tumor necrosis factor related protein 7                           |
| 5    | NM_004355 | <i>CD74</i>    | CD74 molecule, major histocompatibility complex, class II invariant chain |
| 6    | NM_001276 | <i>CHI3L1</i>  | Chitinase 3-like 1 (cartilage glycoprotein-39)                            |
| 7    | NM_022131 | <i>CLSTN2</i>  | Calsyntenin 2                                                             |
| 8    | NM_001855 | <i>COL15A1</i> | Collagen, type XV, alpha 1                                                |
| 9    | NM_001874 | <i>CPM</i>     | Carboxypeptidase M                                                        |
| 10   | NM_004419 | <i>DUSP5</i>   | Dual specificity phosphatase 5                                            |
| 11   | NM_006350 | <i>FST</i>     | Follistatin                                                               |
| 12   | NM_000618 | <i>IGF1</i>    | Insulin-like growth factor 1 (somatomedin C)                              |
| 13   | NM_000612 | <i>IGF2</i>    | Insulin-like growth factor 2 (somatomedin A)                              |
| 14   | NM_000261 | <i>MYOC</i>    | Myocilin, trabecular meshwork inducible glucocorticoid response           |
| 15   | NM_015039 | <i>NMNAT2</i>  | Nicotinamide nucleotide adenyltransferase 2                               |
| 16   | NM_000905 | <i>NPY</i>     | Neuropeptide Y                                                            |
| 17   | NM_005010 | <i>NRCAM</i>   | Neuronal cell adhesion molecule                                           |
| 18   | NM_006180 | <i>NTRK2</i>   | Neurotrophic tyrosine kinase, receptor, type 2                            |
| 19   | NM_000275 | <i>OCA2</i>    | Oculocutaneous albinism II                                                |
| 20   | NM_002612 | <i>PDK4</i>    | Pyruvate dehydrogenase kinase, isozyme 4                                  |
| 21   | NM_002820 | <i>PTHLH</i>   | Parathyroid hormone-like hormone                                          |
| 22   | NM_004103 | <i>PTK2B</i>   | PTK2B protein tyrosine kinase 2 beta                                      |
| 23   | NM_014059 | <i>RGCC</i>    | Regulator Of Cell Cycle                                                   |
| 24   | NM_000331 | <i>SAA1</i>    | Serum amyloid A1                                                          |
| 25   | NM_006922 | <i>SCN3A</i>   | Sodium channel, voltage-gated, type III, alpha subunit                    |
| 26   | NM_016932 | <i>SIX2</i>    | SIX homeobox 2                                                            |
| 27   | NM_012391 | <i>SPDEF</i>   | SAM pointed domain containing ets transcription factor                    |
| 28   | NM_024636 | <i>STEAP4</i>  | STEAP family member 4                                                     |

|    |           |               |                                          |
|----|-----------|---------------|------------------------------------------|
| 29 | NM_003256 | <i>TIMP4</i>  | TIMP metallopeptidase inhibitor 4        |
| 30 | NM_170744 | <i>UNC5B</i>  | Unc-5 homolog B                          |
| 31 | NM_004385 | <i>VCAN</i>   | Versican                                 |
| 32 | NM_006006 | <i>ZBTB16</i> | Zinc finger and BTB domain containing 16 |

**Supplementary Table S3:** The Raw Data of the IOP of Perfusion Cultured Indian Cadaveric Eyes

| Dose group<br>(nM) | R/NR                                                                                        | ID        | Stabilization<br>period (h) | Pressure change before and after drug treatment (mmHg) |       |       |       |       |       |       |       | mΔ IOP<br>(mmHg) |
|--------------------|---------------------------------------------------------------------------------------------|-----------|-----------------------------|--------------------------------------------------------|-------|-------|-------|-------|-------|-------|-------|------------------|
|                    |                                                                                             |           |                             | D0                                                     | D1    | D2    | D3    | D4    | D5    | D6    | D7    |                  |
| 100                | R                                                                                           | OCHD18-53 | 51.3                        | 22.89                                                  | 30.72 | 35.47 | 49.43 | 54.96 | 39.82 | 22.77 | 24.63 | 13.94            |
|                    |                                                                                             | OCHD18-57 | 40.8                        | 17.57                                                  | 16.47 | 17.94 | 18.62 | 18.16 | 22.73 | 35.99 | 37.21 | 6.30             |
|                    |                                                                                             | OCHD19-03 | 43.1                        | 18.20                                                  | 33.94 | 34.10 | 32.25 | 30.54 | 31.32 | 32.50 | 32.96 | 14.32            |
|                    |                                                                                             | OCHD19-04 | 35.5                        | 21.62                                                  | 21.71 | 23.49 | 28.47 | 33.03 | 33.80 | 33.61 | 31.81 | 7.80             |
|                    |                                                                                             | OCHD20-04 | 65.1                        | 10.29                                                  | 12.27 | 23.35 | 43.61 | 55.56 | 56.21 | 54.71 | 56.20 | 32.84            |
|                    |                                                                                             | OCHD20-09 | 37.8                        | 11.94                                                  | 15.47 | 24.34 | 20.79 | 22.40 | 23.70 | 12.74 | 15.63 | 7.36             |
|                    |                                                                                             | OCHD20-14 | 68.3                        | 22.75                                                  | 23.96 | 28.84 | 35.16 | 42.68 | 42.76 | 41.77 | 43.33 | 14.18            |
|                    | Baseline IOP (IOP on day 0): mean= 17.89, SEM= 1.93, mΔ IOP: mean= 13.82, SEM= 3.4.10; N= 7 |           |                             |                                                        |       |       |       |       |       |       |       |                  |
|                    | NR                                                                                          | OCHD18-29 | 62.3                        | 22.61                                                  | 23.48 | 24.43 | 23.22 | 22.20 | 23.13 | 23.05 | 23.82 | 0.72             |
|                    |                                                                                             | OCHD18-49 | 33.3                        | 13.25                                                  | 13.61 | 16.96 | 14.58 | 19.37 | 15.68 | 14.84 | 17.65 | 2.85             |
|                    |                                                                                             | OCHD18-52 | 48.1                        | 20.75                                                  | 20.86 | 23.22 | 24.63 | 25.66 | 25.12 | 25.32 | 22.98 | 3.22             |
|                    |                                                                                             | OCHD18-56 | 40.8                        | 21.71                                                  | 21.90 | 18.18 | 14.83 | 13.40 | 13.13 | 13.20 | 13.23 | 0 <sup>a</sup>   |
|                    |                                                                                             | OCHD19-01 | 55.6                        | 11.73                                                  | 16.28 | 12.19 | 15.07 | 10.34 | 11.59 | 14.53 | 11.65 | 1.36             |
|                    |                                                                                             | OCHD19-02 | 27                          | 12.50                                                  | 13.18 | 16.60 | 13.34 | 12.42 | 11.78 | 10.09 | 10.61 | 0.07             |
|                    |                                                                                             | OCHD20-05 | 50.5                        | 19.27                                                  | 18.91 | 20.26 | 19.39 | 17.28 | 16.14 | 15.92 | 16.08 | 0 <sup>a</sup>   |
|                    |                                                                                             | OCHD20-06 | 48.5                        | 11.99                                                  | 11.86 | 10.71 | 7.71  | 6.83  | 6.73  | 8.81  | 9.32  | 0 <sup>a</sup>   |
|                    |                                                                                             | OCHD20-10 | 47.8                        | 15.45                                                  | 13.42 | 10.89 | 10.01 | 7.97  | 8.44  | 9.94  | 9.65  | 0 <sup>a</sup>   |
|                    | Baseline IOP (IOP on day 0): mean= 16.59, SEM= 1.7, mΔ IOP: mean= 0.91, SEM = 0.43; N= 9    |           |                             |                                                        |       |       |       |       |       |       |       |                  |

Note: <sup>a</sup>Minus values are given as 0; Day 0 represents the day before respective drug treatments; R - Responder; NR- Non-responder

**Supplementary Table S4:** Alignment Statistics of RNA Sequencing Data

| S. No | R/NR | ID    | mRNA                         |                      |                        |              |       |
|-------|------|-------|------------------------------|----------------------|------------------------|--------------|-------|
|       |      |       | Total Reads<br>(In millions) | % Of Mapped<br>Reads | % Of Unmapped<br>Reads | No. of Genes |       |
| 1     | R    | 18-39 | ETH                          | 21.1                 | 85.08                  | 14.92        | 15765 |
|       |      |       | DEX                          | 29.3                 | 84.79                  | 15.11        | 17079 |
| 2     |      | 18-53 | ETH                          | 22.5                 | 85.76                  | 14.24        | 17371 |
|       |      |       | DEX                          | 36.2                 | 82.11                  | 17.89        | 16415 |
| 3     |      | 19-03 | ETH                          | 23.4                 | 84.91                  | 15.09        | 15353 |
|       |      |       | DEX                          | 30.5                 | 87.00                  | 13.00        | 16396 |
| 4     |      | 19-04 | ETH                          | 27.5                 | 87.40                  | 12.60        | 14515 |
|       |      |       | DEX                          | 30.7                 | 85.38                  | 14.62        | 16334 |
| 5     |      | 18-49 | ETH                          | 26.8                 | 84.30                  | 15.70        | 15439 |
|       |      |       | DEX                          | 30.3                 | 85.22                  | 14.78        | 15637 |
| 6     | NR   | 18-52 | ETH                          | 23.1                 | 84.42                  | 15.58        | 14682 |
|       |      |       | DEX                          | 28.4                 | 86.27                  | 13.73        | 15997 |
| 7     |      | 18-56 | ETH                          | 24.8                 | 86.28                  | 13.72        | 15852 |
|       |      |       | DEX                          | 36.2                 | 86.28                  | 13.72        | 16654 |
| 8     |      | 19-02 | ETH                          | 23.4                 | 88.60                  | 11.40        | 16039 |
|       |      |       | DEX                          | 32.7                 | 85.84                  | 14.16        | 16828 |
|       |      | Mean  | 28                           | 86                   | 14.4                   | 16022        |       |

**Supplementary Table S5a.** List of top 50 Up/Down-regulated Genes from Group #1

| Up-regulated genes |       |        |         | Down-regulated genes |       |        |         |
|--------------------|-------|--------|---------|----------------------|-------|--------|---------|
| Gene               | logFC | logCPM | P Value | Gene                 | logFC | logCPM | P Value |
| <i>SAA1</i>        | 6.34  | 2.81   | 0.000   | <i>UPK3A</i>         | -8.49 | 0.36   | 0.001   |
| <i>ZBTB16</i>      | 5.60  | 4.66   | 0.000   | <i>RLN1</i>          | -8.02 | 1.24   | 0.001   |
| <i>FRG2C</i>       | 5.27  | -2.07  | 0.002   | <i>FAM110D</i>       | -7.42 | -0.59  | 0.002   |
| <i>NPSR1-AS1</i>   | 5.07  | -2.19  | 0.016   | <i>PRSS22</i>        | -7.38 | -0.62  | 0.002   |
| <i>BHLHE22</i>     | 5.04  | 0.77   | 0.012   | <i>NPY</i>           | -7.26 | 3.41   | 0.000   |
| <i>SAA4</i>        | 4.75  | -2.34  | 0.028   | <i>GIMAP1</i>        | -6.96 | -0.98  | 0.001   |
| <i>SAA2</i>        | 4.71  | 0.71   | 0.003   | <i>ST14</i>          | -6.81 | 1.52   | 0.001   |
| <i>OCA2</i>        | 4.71  | 1.61   | 0.000   | <i>LRRC26</i>        | -6.79 | 1.53   | 0.002   |
| <i>PRODH</i>       | 4.46  | 3.17   | 0.000   | <i>KRT15</i>         | -6.67 | 3.39   | 0.000   |
| <i>H19</i>         | 4.44  | 7.60   | 0.000   | <i>FXYD3</i>         | -6.59 | 2.02   | 0.001   |
| <i>PRR33</i>       | 4.22  | 1.04   | 0.000   | <i>PRAC1</i>         | -6.58 | -0.09  | 0.003   |
| <i>HIF3A</i>       | 4.20  | 4.11   | 0.000   | <i>HOXB13</i>        | -6.57 | 2.99   | 0.003   |
| <i>P2RY14</i>      | 4.14  | 1.13   | 0.001   | <i>TPSB2</i>         | -6.50 | 0.98   | 0.002   |
| <i>LINC01088</i>   | 4.14  | 1.46   | 0.000   | <i>ACPP</i>          | -6.48 | 6.82   | 0.002   |
| <i>FKBP5</i>       | 3.99  | 7.23   | 0.000   | <i>LCN2</i>          | -6.47 | 0.44   | 0.001   |
| <i>MYOC</i>        | 3.95  | 6.57   | 0.014   | <i>KLK3</i>          | -6.39 | 7.58   | 0.002   |
| <i>CPM</i>         | 3.93  | 4.02   | 0.000   | <i>KCNH2</i>         | -6.34 | 0.38   | 0.002   |
| <i>ANGPTL7</i>     | 3.93  | 8.01   | 0.016   | <i>AQP1</i>          | -6.33 | 7.61   | 0.000   |
| <i>LSP1</i>        | 3.91  | 5.22   | 0.000   | <i>DOC2B</i>         | -6.30 | -0.33  | 0.001   |
| <i>LINC00702</i>   | 3.82  | 3.76   | 0.000   | <i>LINC01297</i>     | -6.30 | 1.17   | 0.002   |
| <i>TUSC5</i>       | 3.79  | -1.37  | 0.015   | <i>TPSAB1</i>        | -6.26 | 0.71   | 0.001   |
| <i>LEP</i>         | 3.75  | -0.16  | 0.012   | <i>RBBP8NL</i>       | -6.22 | -1.54  | 0.009   |
| <i>SLC16A12</i>    | 3.72  | 1.63   | 0.000   | <i>CHRNA2</i>        | -6.21 | 1.31   | 0.002   |
| <i>RNA5SP111</i>   | 3.63  | -2.00  | 0.049   | <i>SLC52A3</i>       | -6.20 | -0.35  | 0.002   |
| <i>IGF2</i>        | 3.56  | 6.66   | 0.000   | <i>KLK4</i>          | -6.20 | 3.10   | 0.006   |
| <i>KCNE1</i>       | 3.55  | 0.74   | 0.010   | <i>KRT5</i>          | -6.19 | 2.48   | 0.001   |
| <i>ANGPTL1</i>     | 3.54  | 3.59   | 0.000   | <i>MT1H</i>          | -6.18 | -1.57  | 0.005   |
| <i>RPL7P57</i>     | 3.49  | -2.06  | 0.019   | <i>KLK2</i>          | -6.17 | 6.41   | 0.004   |
| <i>TLDC2</i>       | 3.48  | 1.28   | 0.000   | <i>CCDC64B</i>       | -6.03 | 0.46   | 0.001   |
| <i>NTRK2</i>       | 3.39  | 5.15   | 0.002   | <i>SFN</i>           | -6.02 | 1.83   | 0.000   |
| <i>ADH1B</i>       | 3.39  | 7.72   | 0.001   | <i>DES</i>           | -5.98 | 6.03   | 0.001   |
| <i>FMO2</i>        | 3.38  | 3.38   | 0.002   | <i>MSMB</i>          | -5.97 | 4.06   | 0.006   |
| <i>SAMHD1</i>      | 3.36  | 7.81   | 0.000   | <i>COL9A1</i>        | -5.96 | 2.75   | 0.000   |
| <i>GIP</i>         | 3.36  | -1.29  | 0.008   | <i>C2orf54</i>       | -5.94 | -1.73  | 0.012   |
| <i>APOD</i>        | 3.35  | 7.28   | 0.018   | <i>PAGE4</i>         | -5.94 | 0.47   | 0.004   |
| <i>RN7SKP69</i>    | 3.30  | -1.68  | 0.004   | <i>EVX2</i>          | -5.90 | -1.76  | 0.008   |
| <i>MIR5690</i>     | 3.22  | -1.75  | 0.012   | <i>PLVAP</i>         | -5.87 | 1.64   | 0.002   |
| <i>SCN3A</i>       | 3.09  | 0.86   | 0.008   | <i>RAMP3</i>         | -5.83 | 0.30   | 0.002   |
| <i>TNFAIP8L3</i>   | 3.09  | 3.20   | 0.001   | <i>RAB25</i>         | -5.81 | 0.28   | 0.002   |
| <i>MAP1LC3C</i>    | 3.01  | 3.54   | 0.026   | <i>HOXA9</i>         | -5.78 | -0.78  | 0.007   |
| <i>FHL5</i>        | 2.99  | -0.36  | 0.016   | <i>CHRM1</i>         | -5.77 | 0.88   | 0.003   |



|                 |      |       |       |               |       |       |       |
|-----------------|------|-------|-------|---------------|-------|-------|-------|
| <i>SEMG1</i>    | 2.97 | -1.56 | 0.047 | <i>PDE9A</i>  | -5.68 | 1.33  | 0.000 |
| <i>ABRA</i>     | 2.93 | 0.31  | 0.012 | <i>SHH</i>    | -5.67 | -1.91 | 0.010 |
| <i>ADRA1B</i>   | 2.91 | 2.49  | 0.000 | <i>GIMAP7</i> | -5.67 | -0.28 | 0.004 |
| <i>AFF2</i>     | 2.90 | 1.40  | 0.007 | <i>SPOCK3</i> | -5.64 | 1.74  | 0.001 |
| <i>ADH1A</i>    | 2.85 | 1.95  | 0.014 | <i>LCN6</i>   | -5.61 | -1.94 | 0.011 |
| <i>SLC16A10</i> | 2.84 | 1.28  | 0.028 | <i>GNA15</i>  | -5.60 | -0.92 | 0.002 |
| <i>XRCC6P2</i>  | 2.82 | -0.36 | 0.001 | <i>HOXA10</i> | -5.59 | 0.11  | 0.001 |
| <i>BCRP1</i>    | 2.82 | -1.97 | 0.032 | <i>MMP7</i>   | -5.58 | 1.84  | 0.004 |
| <i>HSPD1P11</i> | 2.81 | 1.79  | 0.001 | <i>GATA5</i>  | -5.58 | -0.87 | 0.009 |

Note: *Group #1*: DEGs between DEX and ETH treated GC-R HTM cells

**Supplementary Table S5b.** List of top 50 Up/Down-regulated Genes from Group #2

| Up-regulated genes |       |        |         | Down-regulated genes |       |        |         |
|--------------------|-------|--------|---------|----------------------|-------|--------|---------|
| Gene               | logFC | logCPM | P Value | Gene                 | logFC | logCPM | P Value |
| <i>ZBTB16</i>      | 8.48  | 4.59   | 0.000   | <i>MXRA5Y</i>        | -5.08 | -0.47  | 0.003   |
| <i>RGCC</i>        | 7.75  | 1.95   | 0.000   | <i>GRM5</i>          | -5.05 | -2.43  | 0.010   |
| <i>OCA2</i>        | 6.89  | 2.24   | 0.000   | <i>RARRES2</i>       | -3.94 | 3.36   | 0.000   |
| <i>H19</i>         | 6.67  | 8.47   | 0.000   | <i>AQP1</i>          | -3.91 | 4.05   | 0.000   |
| <i>MYOC</i>        | 6.40  | 9.28   | 0.001   | <i>SLC24A2</i>       | -3.89 | -1.78  | 0.025   |
| <i>HIF3A</i>       | 6.19  | 2.63   | 0.000   | <i>LAMP3</i>         | -3.82 | 0.03   | 0.000   |
| <i>APOD</i>        | 6.03  | 8.49   | 0.000   | <i>GRIA2</i>         | -3.82 | 0.29   | 0.001   |
| <i>APCDD1</i>      | 5.95  | 2.15   | 0.000   | <i>RBFOX1</i>        | -3.80 | -1.82  | 0.048   |
| <i>IGF2-AS</i>     | 5.88  | -1.83  | 0.002   | <i>KRT17P1</i>       | -3.77 | -1.24  | 0.009   |
| <i>PNMT</i>        | 5.76  | -1.91  | 0.002   | <i>TNFSF18</i>       | -3.76 | 0.09   | 0.001   |
| <i>SAA1</i>        | 5.75  | 1.16   | 0.000   | <i>GRID2</i>         | -3.67 | -0.01  | 0.002   |
| <i>RAMP2-AS1</i>   | 5.64  | 0.83   | 0.000   | <i>VCAN-AS1</i>      | -3.63 | -1.95  | 0.003   |
| <i>ALOX15B</i>     | 5.51  | -0.80  | 0.000   | <i>PADI2</i>         | -3.55 | 0.96   | 0.000   |
| <i>ADH1B</i>       | 5.38  | 6.06   | 0.000   | <i>PII6</i>          | -3.49 | -0.82  | 0.008   |
| <i>PTGDR2</i>      | 5.24  | -2.22  | 0.003   | <i>KLHDC7B</i>       | -3.22 | -0.85  | 0.003   |
| <i>LINC00525</i>   | 5.13  | -2.29  | 0.003   | <i>LRRC15</i>        | -3.21 | 4.55   | 0.017   |
| <i>FKBP5</i>       | 4.87  | 7.62   | 0.000   | <i>IGFL2</i>         | -3.20 | -2.15  | 0.040   |
| <i>LSP1</i>        | 4.81  | 4.97   | 0.000   | <i>C1orf87</i>       | -3.10 | -2.21  | 0.032   |
| <i>PRODH</i>       | 4.58  | 2.59   | 0.000   | <i>NPY6R</i>         | -3.09 | -2.22  | 0.036   |
| <i>P2RY14</i>      | 4.57  | 0.98   | 0.000   | <i>NMNAT2</i>        | -3.02 | 3.71   | 0.014   |
| <i>STEAP4</i>      | 4.57  | 3.40   | 0.000   | <i>CLDN1</i>         | -3.01 | 1.69   | 0.000   |
| <i>SCN3A</i>       | 4.54  | 3.24   | 0.001   | <i>ADM2</i>          | -2.93 | 4.72   | 0.000   |
| <i>SFTPC</i>       | 4.51  | -2.59  | 0.021   | <i>RIMS3</i>         | -2.91 | 2.92   | 0.002   |
| <i>MAOA</i>        | 4.44  | 4.35   | 0.000   | <i>CCND2-AS1</i>     | -2.91 | -1.15  | 0.007   |
| <i>FAM107A</i>     | 4.43  | 5.13   | 0.000   | <i>IL32</i>          | -2.91 | 2.34   | 0.007   |
| <i>HMGN2P15</i>    | 4.37  | -0.64  | 0.002   | <i>TMEM63C</i>       | -2.84 | -1.45  | 0.003   |
| <i>ANGPTL7</i>     | 4.31  | 9.66   | 0.007   | <i>COL19A1</i>       | -2.79 | 0.34   | 0.001   |
| <i>FHL5</i>        | 4.24  | -0.81  | 0.005   | <i>NGEF</i>          | -2.76 | 0.86   | 0.020   |
| <i>SOAT2</i>       | 4.13  | -0.86  | 0.001   | <i>KAL1</i>          | -2.75 | 2.99   | 0.007   |
| <i>PRR33</i>       | 4.13  | 0.77   | 0.000   | <i>WNT2</i>          | -2.70 | 0.87   | 0.001   |
| <i>CPM</i>         | 4.06  | 3.13   | 0.000   | <i>VCAN</i>          | -2.69 | 7.10   | 0.001   |
| <i>SAA2</i>        | 4.06  | -1.83  | 0.004   | <i>CCND2-AS2</i>     | -2.69 | -1.72  | 0.032   |
| <i>TRAV39</i>      | 4.03  | -0.91  | 0.012   | <i>C2orf40</i>       | -2.67 | 1.60   | 0.000   |
| <i>IGF2</i>        | 4.01  | 6.48   | 0.000   | <i>NGFR</i>          | -2.65 | -1.76  | 0.020   |
| <i>LGI3</i>        | 3.70  | -0.07  | 0.001   | <i>IPCEF1</i>        | -2.64 | -2.20  | 0.047   |
| <i>INHBB</i>       | 3.67  | 1.41   | 0.000   | <i>VNN1</i>          | -2.63 | -1.99  | 0.034   |
| <i>SAMHD1</i>      | 3.57  | 7.45   | 0.000   | <i>ARHGAP9</i>       | -2.62 | -0.48  | 0.003   |
| <i>RPA4</i>        | 3.56  | -2.16  | 0.006   | <i>ADRA2A</i>        | -2.60 | 2.91   | 0.001   |
| <i>PDK4</i>        | 3.52  | 4.49   | 0.000   | <i>RDH12</i>         | -2.57 | -1.62  | 0.012   |
| <i>ANKRD2</i>      | 3.48  | 1.17   | 0.002   | <i>PRSS35</i>        | -2.57 | 3.69   | 0.001   |
| <i>LINC00702</i>   | 3.44  | 4.81   | 0.000   | <i>MYHAS</i>         | -2.56 | -1.50  | 0.012   |

|                  |      |       |       |                   |       |       |       |
|------------------|------|-------|-------|-------------------|-------|-------|-------|
| <i>ANGPTL1</i>   | 3.42 | 2.28  | 0.000 | <i>SLC14A1</i>    | -2.53 | 0.08  | 0.047 |
| <i>CHI3L2</i>    | 3.34 | 3.45  | 0.015 | <i>EPHA3</i>      | -2.52 | 0.55  | 0.007 |
| <i>SCARA5</i>    | 3.34 | -0.26 | 0.004 | <i>CNGA1</i>      | -2.49 | -1.82 | 0.036 |
| <i>GPRC5B</i>    | 3.26 | 5.02  | 0.000 | <i>ELOVL2-AS1</i> | -2.46 | -1.70 | 0.012 |
| <i>USP2</i>      | 3.25 | 2.49  | 0.001 | <i>KRT23</i>      | -2.44 | -1.92 | 0.036 |
| <i>TNNT3</i>     | 3.12 | -0.91 | 0.001 | <i>RGS7BP</i>     | -2.43 | -0.27 | 0.031 |
| <i>POM121L9P</i> | 3.12 | 2.50  | 0.000 | <i>CHAC1</i>      | -2.43 | 4.19  | 0.000 |
| <i>ISM1</i>      | 3.11 | -0.30 | 0.001 | <i>ATPIA3</i>     | -2.43 | -0.96 | 0.004 |
| <i>NCAM1-AS1</i> | 3.10 | -2.39 | 0.046 | <i>SEMA3D</i>     | -2.42 | 1.49  | 0.026 |

**Note:** Group #2: DEGs between DEX and ETH treated GC-NR HTM cells

**Supplementary Table S5c.** List of Genes from Group #3

| Gene             | Group#1 |        |         | Group#2 |        |         |
|------------------|---------|--------|---------|---------|--------|---------|
|                  | logFC   | logCPM | P Value | logFC   | logCPM | P Value |
| <i>ZBTB16</i>    | 5.60    | 4.66   | 0.000   | 8.48    | 4.59   | 0.000   |
| <i>OCA2</i>      | 4.71    | 1.61   | 0.000   | 6.89    | 2.24   | 0.000   |
| <i>H19</i>       | 4.44    | 7.60   | 0.000   | 6.67    | 8.47   | 0.000   |
| <i>MYOC</i>      | 3.95    | 6.57   | 0.014   | 6.40    | 9.28   | 0.001   |
| <i>HIF3A</i>     | 4.20    | 4.11   | 0.000   | 6.19    | 2.63   | 0.000   |
| <i>APOD</i>      | 3.35    | 7.28   | 0.018   | 6.03    | 8.49   | 0.000   |
| <i>SAA1</i>      | 6.34    | 2.81   | 0.000   | 5.75    | 1.16   | 0.000   |
| <i>ADH1B</i>     | 3.39    | 7.72   | 0.001   | 5.38    | 6.06   | 0.000   |
| <i>FKBP5</i>     | 3.99    | 7.23   | 0.000   | 4.87    | 7.62   | 0.000   |
| <i>LSP1</i>      | 3.91    | 5.22   | 0.000   | 4.81    | 4.97   | 0.000   |
| <i>PRODH</i>     | 4.46    | 3.17   | 0.000   | 4.58    | 2.59   | 0.000   |
| <i>P2RY14</i>    | 4.14    | 1.13   | 0.001   | 4.57    | 0.98   | 0.000   |
| <i>SCN3A</i>     | 3.09    | 0.86   | 0.008   | 4.54    | 3.24   | 0.001   |
| <i>MAOA</i>      | 2.54    | 4.68   | 0.005   | 4.44    | 4.35   | 0.000   |
| <i>ANGPTL7</i>   | 3.93    | 8.01   | 0.016   | 4.31    | 9.66   | 0.007   |
| <i>FHL5</i>      | 2.99    | -0.36  | 0.016   | 4.24    | -0.81  | 0.005   |
| <i>PRR33</i>     | 4.22    | 1.04   | 0.000   | 4.13    | 0.77   | 0.000   |
| <i>CPM</i>       | 3.93    | 4.02   | 0.000   | 4.06    | 3.13   | 0.000   |
| <i>SAA2</i>      | 4.71    | 0.71   | 0.003   | 4.06    | -1.83  | 0.004   |
| <i>IGF2</i>      | 3.56    | 6.66   | 0.000   | 4.01    | 6.48   | 0.000   |
| <i>SAMHD1</i>    | 3.36    | 7.81   | 0.000   | 3.57    | 7.45   | 0.000   |
| <i>PDK4</i>      | 2.24    | 5.55   | 0.000   | 3.52    | 4.49   | 0.000   |
| <i>LINC00702</i> | 3.82    | 3.76   | 0.000   | 3.44    | 4.81   | 0.000   |
| <i>ANGPTL1</i>   | 3.54    | 3.59   | 0.000   | 3.42    | 2.28   | 0.000   |
| <i>USP2</i>      | 2.22    | 2.21   | 0.015   | 3.25    | 2.49   | 0.001   |
| <i>MRO</i>       | 2.68    | 1.62   | 0.037   | 3.10    | 1.99   | 0.003   |
| <i>AOX1</i>      | 2.21    | 6.79   | 0.004   | 3.10    | 5.53   | 0.000   |
| <i>GALNT15</i>   | 2.26    | 4.60   | 0.014   | 3.04    | 4.52   | 0.012   |
| <i>NEDD9</i>     | 2.53    | 7.45   | 0.004   | 2.99    | 7.79   | 0.000   |
| <i>ACA59</i>     | 2.04    | -1.44  | 0.034   | 2.96    | -1.20  | 0.007   |
| <i>ADH1A</i>     | 2.85    | 1.95   | 0.014   | 2.95    | 0.45   | 0.000   |
| <i>FGFR4</i>     | 2.50    | 3.10   | 0.029   | 2.92    | 1.76   | 0.001   |
| <i>ADRA1B</i>    | 2.91    | 2.49   | 0.000   | 2.87    | 3.14   | 0.000   |
| <i>PPP1R14A</i>  | 2.11    | 7.46   | 0.024   | 2.86    | 5.54   | 0.028   |
| <i>XRCC6P2</i>   | 2.82    | -0.36  | 0.001   | 2.84    | -0.33  | 0.005   |
| <i>ABCA6</i>     | 2.08    | 4.75   | 0.008   | 2.82    | 3.39   | 0.002   |
| <i>TIMP4</i>     | 2.07    | 1.11   | 0.025   | 2.78    | 2.41   | 0.000   |
| <i>SLC16A12</i>  | 3.72    | 1.63   | 0.000   | 2.75    | -0.57  | 0.002   |
| <i>ADH4</i>      | 2.54    | -1.36  | 0.029   | 2.74    | -0.95  | 0.005   |
| <i>FAM46B</i>    | 2.15    | 4.36   | 0.001   | 2.53    | 4.96   | 0.001   |
| <i>SLC16A10</i>  | 2.84    | 1.28   | 0.028   | 2.47    | 0.64   | 0.011   |

|                  |       |       |       |       |       |       |
|------------------|-------|-------|-------|-------|-------|-------|
| <i>FPR1</i>      | 2.70  | -0.01 | 0.007 | 2.46  | 0.79  | 0.024 |
| <i>MOB3B</i>     | 2.61  | 2.14  | 0.001 | 2.45  | 2.31  | 0.020 |
| <i>LINC01088</i> | 4.14  | 1.46  | 0.000 | 2.45  | 0.41  | 0.005 |
| <i>FMO2</i>      | 3.38  | 3.38  | 0.002 | 2.40  | 1.29  | 0.002 |
| <i>TLDC2</i>     | 3.48  | 1.28  | 0.000 | 2.38  | 1.05  | 0.003 |
| <i>ANGPTL5</i>   | 2.39  | 0.70  | 0.015 | 2.25  | 1.24  | 0.001 |
| <i>OLAH</i>      | 2.57  | 2.30  | 0.004 | 2.20  | 0.37  | 0.004 |
| <i>PER1</i>      | 2.11  | 6.11  | 0.000 | 2.20  | 5.87  | 0.000 |
| <i>TRPV6</i>     | -3.05 | 1.87  | 0.019 | 2.17  | 0.67  | 0.014 |
| <i>DKK2</i>      | 2.46  | 3.59  | 0.016 | 2.17  | 3.54  | 0.017 |
| <i>FST</i>       | -2.08 | 6.67  | 0.000 | -2.01 | 6.50  | 0.000 |
| <i>TNFSF15</i>   | -2.05 | 0.31  | 0.017 | -2.05 | -1.40 | 0.026 |
| <i>CERS1</i>     | -2.05 | -0.45 | 0.033 | -2.07 | -0.49 | 0.018 |
| <i>ARSI</i>      | -2.42 | 3.36  | 0.001 | -2.13 | 3.10  | 0.000 |
| <i>TNNT2</i>     | -2.29 | 1.92  | 0.026 | -2.14 | -0.86 | 0.049 |
| <i>BST2</i>      | -4.64 | 1.92  | 0.000 | -2.20 | -0.98 | 0.012 |
| <i>RGS16</i>     | -2.34 | 5.10  | 0.007 | -2.21 | 5.59  | 0.028 |
| <i>TAC3</i>      | -3.33 | -1.20 | 0.002 | -2.23 | -1.29 | 0.033 |
| <i>FNDC1</i>     | -2.67 | 4.35  | 0.005 | -2.27 | 5.07  | 0.003 |
| <i>SEMA6B</i>    | -2.30 | 1.97  | 0.016 | -2.28 | 1.15  | 0.001 |
| <i>CPA4</i>      | -2.42 | 3.57  | 0.002 | -2.34 | 2.68  | 0.034 |
| <i>CILP2</i>     | -2.02 | 0.07  | 0.026 | -2.34 | 0.13  | 0.024 |
| <i>RGS7BP</i>    | -2.34 | -1.10 | 0.029 | -2.43 | -0.27 | 0.031 |
| <i>KRT23</i>     | -3.53 | 0.24  | 0.023 | -2.44 | -1.92 | 0.036 |
| <i>SLC14A1</i>   | -2.58 | 2.94  | 0.041 | -2.53 | 0.08  | 0.047 |
| <i>PRSS35</i>    | -2.32 | 3.30  | 0.000 | -2.57 | 3.69  | 0.001 |
| <i>ADRA2A</i>    | -4.16 | 4.99  | 0.002 | -2.60 | 2.91  | 0.001 |
| <i>NGFR</i>      | -2.06 | 0.83  | 0.041 | -2.65 | -1.76 | 0.020 |
| <i>C2orf40</i>   | -5.16 | 2.72  | 0.000 | -2.67 | 1.60  | 0.000 |
| <i>WNT2</i>      | -3.86 | 2.59  | 0.000 | -2.70 | 0.87  | 0.001 |
| <i>NGEF</i>      | -2.86 | -0.57 | 0.016 | -2.76 | 0.86  | 0.020 |
| <i>TMEM63C</i>   | -2.25 | -1.54 | 0.042 | -2.84 | -1.45 | 0.003 |
| <i>LRRC15</i>    | -2.42 | 2.19  | 0.026 | -3.21 | 4.55  | 0.017 |
| <i>PII6</i>      | -3.79 | 2.47  | 0.019 | -3.49 | -0.82 | 0.008 |
| <i>TNFSF18</i>   | -4.19 | 0.95  | 0.000 | -3.76 | 0.09  | 0.001 |
| <i>LAMP3</i>     | -3.62 | 0.92  | 0.002 | -3.82 | 0.03  | 0.000 |
| <i>AQP1</i>      | -6.33 | 7.61  | 0.000 | -3.91 | 4.05  | 0.000 |
| <i>RARRES2</i>   | -2.19 | 5.97  | 0.016 | -3.94 | 3.36  | 0.000 |
| <i>MXRA5Y</i>    | -2.78 | -1.55 | 0.043 | -5.08 | -0.47 | 0.003 |

Note: *Group #3*: DEGs that are common to *Group #1* and *Group #2*

**Supplementary Table S5d:** List of top 50 Up/Down-regulated Genes from Group #4

| Up-regulated genes |       |        |         | Down-regulated genes |       |        |         |
|--------------------|-------|--------|---------|----------------------|-------|--------|---------|
| Gene               | logFC | logCPM | P Value | Gene                 | logFC | logCPM | P Value |
| <i>FRG2C</i>       | 5.27  | -2.07  | 0.002   | <i>UPK3A</i>         | -8.49 | 0.36   | 0.001   |
| <i>NPSRI-AS1</i>   | 5.07  | -2.19  | 0.016   | <i>RLN1</i>          | -8.02 | 1.24   | 0.001   |
| <i>BHLHE22</i>     | 5.04  | 0.77   | 0.012   | <i>FAM110D</i>       | -7.42 | -0.59  | 0.002   |
| <i>SAA4</i>        | 4.75  | -2.34  | 0.028   | <i>PRSS22</i>        | -7.38 | -0.62  | 0.002   |
| <i>TUSC5</i>       | 3.79  | -1.37  | 0.015   | <i>NPY</i>           | -7.26 | 3.41   | 0.000   |
| <i>LEP</i>         | 3.75  | -0.16  | 0.012   | <i>GIMAP1</i>        | -6.96 | -0.98  | 0.001   |
| <i>RNA5SP111</i>   | 3.63  | -2.00  | 0.049   | <i>ST14</i>          | -6.81 | 1.52   | 0.001   |
| <i>KCNE1</i>       | 3.55  | 0.74   | 0.010   | <i>LRRC26</i>        | -6.79 | 1.53   | 0.002   |
| <i>RPL7P57</i>     | 3.49  | -2.06  | 0.019   | <i>KRT15</i>         | -6.67 | 3.39   | 0.000   |
| <i>NTRK2</i>       | 3.39  | 5.15   | 0.002   | <i>FXYD3</i>         | -6.59 | 2.02   | 0.001   |
| <i>GIP</i>         | 3.36  | -1.29  | 0.008   | <i>PRAC1</i>         | -6.58 | -0.09  | 0.003   |
| <i>RN7SKP69</i>    | 3.30  | -1.68  | 0.004   | <i>HOXB13</i>        | -6.57 | 2.99   | 0.003   |
| <i>MIR5690</i>     | 3.22  | -1.75  | 0.012   | <i>TPSB2</i>         | -6.50 | 0.98   | 0.002   |
| <i>TNFAIP8L3</i>   | 3.09  | 3.20   | 0.001   | <i>ACPP</i>          | -6.48 | 6.82   | 0.002   |
| <i>MAP1LC3C</i>    | 3.01  | 3.54   | 0.026   | <i>LCN2</i>          | -6.47 | 0.44   | 0.001   |
| <i>SEMG1</i>       | 2.97  | -1.56  | 0.047   | <i>KLK3</i>          | -6.39 | 7.58   | 0.002   |
| <i>ABRA</i>        | 2.93  | 0.31   | 0.012   | <i>KCNH2</i>         | -6.34 | 0.38   | 0.002   |
| <i>AFF2</i>        | 2.90  | 1.40   | 0.007   | <i>DOC2B</i>         | -6.30 | -0.33  | 0.001   |
| <i>BCRP1</i>       | 2.82  | -1.97  | 0.032   | <i>LINC01297</i>     | -6.30 | 1.17   | 0.002   |
| <i>HSPD1P11</i>    | 2.81  | 1.79   | 0.001   | <i>TPSAB1</i>        | -6.26 | 0.71   | 0.001   |
| <i>C5AR2</i>       | 2.76  | 0.11   | 0.006   | <i>RBBP8NL</i>       | -6.22 | -1.54  | 0.009   |
| <i>MARCH10</i>     | 2.75  | -0.45  | 0.028   | <i>CHRNA2</i>        | -6.21 | 1.31   | 0.002   |
| <i>KRT18P62</i>    | 2.74  | -1.38  | 0.015   | <i>SLC52A3</i>       | -6.20 | -0.35  | 0.002   |
| <i>HNRNPA3P11</i>  | 2.73  | -1.59  | 0.025   | <i>KLK4</i>          | -6.20 | 3.10   | 0.006   |
| <i>LINC00664</i>   | 2.71  | -2.02  | 0.035   | <i>KRT5</i>          | -6.19 | 2.48   | 0.001   |
| <i>KIAA1456</i>    | 2.70  | 2.33   | 0.000   | <i>MT1H</i>          | -6.18 | -1.57  | 0.005   |
| <i>B3GALT2</i>     | 2.68  | 3.10   | 0.000   | <i>KLK2</i>          | -6.17 | 6.41   | 0.004   |
| <i>PLCE1-AS1</i>   | 2.63  | 4.43   | 0.006   | <i>CCDC64B</i>       | -6.03 | 0.46   | 0.001   |
| <i>CYP51A1P2</i>   | 2.62  | -1.04  | 0.034   | <i>SFN</i>           | -6.02 | 1.83   | 0.000   |
| <i>RAPGEF5</i>     | 2.62  | 3.56   | 0.010   | <i>DES</i>           | -5.98 | 6.03   | 0.001   |
| <i>CCDC54</i>      | 2.60  | -1.08  | 0.018   | <i>MSMB</i>          | -5.97 | 4.06   | 0.006   |
| <i>KLF15</i>       | 2.58  | 4.75   | 0.000   | <i>COL9A1</i>        | -5.96 | 2.75   | 0.000   |
| <i>ITGA10</i>      | 2.55  | 4.93   | 0.000   | <i>C2orf54</i>       | -5.94 | -1.73  | 0.012   |
| <i>PDLIM1P4</i>    | 2.54  | -1.82  | 0.035   | <i>PAGE4</i>         | -5.94 | 0.47   | 0.004   |
| <i>CYP7B1</i>      | 2.53  | 1.20   | 0.008   | <i>EVX2</i>          | -5.90 | -1.76  | 0.008   |
| <i>GPX3</i>        | 2.51  | 7.49   | 0.013   | <i>PLVAP</i>         | -5.87 | 1.64   | 0.002   |
| <i>ANO3</i>        | 2.48  | 0.01   | 0.006   | <i>RAMP3</i>         | -5.83 | 0.30   | 0.002   |
| <i>NKAIN2</i>      | 2.48  | 0.21   | 0.037   | <i>RAB25</i>         | -5.81 | 0.28   | 0.002   |
| <i>LINC00547</i>   | 2.47  | -0.51  | 0.013   | <i>HOXA9</i>         | -5.78 | -0.78  | 0.007   |
| <i>ST7-AS2</i>     | 2.44  | -1.06  | 0.009   | <i>CHRM1</i>         | -5.77 | 0.88   | 0.003   |
| <i>FAM65C</i>      | 2.38  | 3.31   | 0.012   | <i>PDE9A</i>         | -5.68 | 1.33   | 0.000   |

|                  |      |       |       |               |       |       |       |
|------------------|------|-------|-------|---------------|-------|-------|-------|
| <i>ACTG1P3</i>   | 2.33 | -1.48 | 0.038 | <i>SHH</i>    | -5.67 | -1.91 | 0.010 |
| <i>CIQTNF7</i>   | 2.30 | 3.78  | 0.000 | <i>GIMAP7</i> | -5.67 | -0.28 | 0.004 |
| <i>GJA5</i>      | 2.26 | 0.01  | 0.049 | <i>SPOCK3</i> | -5.64 | 1.74  | 0.001 |
| <i>FRMD3</i>     | 2.21 | 1.81  | 0.006 | <i>LCN6</i>   | -5.61 | -1.94 | 0.011 |
| <i>RN7SL608P</i> | 2.19 | -1.55 | 0.028 | <i>GNAI5</i>  | -5.60 | -0.92 | 0.002 |
| <i>TSC22D3</i>   | 2.19 | 8.12  | 0.000 | <i>HOXA10</i> | -5.59 | 0.11  | 0.001 |
| <i>SLC38A11</i>  | 2.16 | 2.84  | 0.014 | <i>MMP7</i>   | -5.58 | 1.84  | 0.004 |
| <i>LDHAL6B</i>   | 2.15 | -1.43 | 0.036 | <i>GATA5</i>  | -5.58 | -0.87 | 0.009 |
| <i>FGF14</i>     | 2.13 | 3.26  | 0.023 | <i>LADI</i>   | -5.57 | -0.94 | 0.006 |

Note: *Group #4*: Uniquely expressed DEGs of GC-R HTM cells (Group #1 minus Group #3)

**Supplementary Table S5e:** List of top 50 Up/Down-regulated Genes from Group #5

| Up-regulated genes |       |        |         | Down-regulated genes |       |        |         |
|--------------------|-------|--------|---------|----------------------|-------|--------|---------|
| Gene               | logFC | logCPM | P Value | Gene                 | logFC | logCPM | P Value |
| <i>RGCC</i>        | 7.75  | 1.95   | 0.000   | <i>GRM5</i>          | -5.05 | -2.43  | 0.010   |
| <i>APCDD1</i>      | 5.95  | 2.15   | 0.000   | <i>SLC24A2</i>       | -3.89 | -1.78  | 0.025   |
| <i>IGF2-AS</i>     | 5.88  | -1.83  | 0.002   | <i>GRIA2</i>         | -3.82 | 0.29   | 0.001   |
| <i>PNMT</i>        | 5.76  | -1.91  | 0.002   | <i>RBFOX1</i>        | -3.80 | -1.82  | 0.048   |
| <i>RAMP2-AS1</i>   | 5.64  | 0.83   | 0.000   | <i>KRT17P1</i>       | -3.77 | -1.24  | 0.009   |
| <i>ALOX15B</i>     | 5.51  | -0.80  | 0.000   | <i>GRID2</i>         | -3.67 | -0.01  | 0.002   |
| <i>PTGDR2</i>      | 5.24  | -2.22  | 0.003   | <i>VCAN-AS1</i>      | -3.63 | -1.95  | 0.003   |
| <i>LINC00525</i>   | 5.13  | -2.29  | 0.003   | <i>PADI2</i>         | -3.55 | 0.96   | 0.000   |
| <i>STEAP4</i>      | 4.57  | 3.40   | 0.000   | <i>KLHDC7B</i>       | -3.22 | -0.85  | 0.003   |
| <i>SFTPC</i>       | 4.51  | -2.59  | 0.021   | <i>IGFL2</i>         | -3.20 | -2.15  | 0.040   |
| <i>FAM107A</i>     | 4.43  | 5.13   | 0.000   | <i>C1orf87</i>       | -3.10 | -2.21  | 0.032   |
| <i>HMGN2P15</i>    | 4.37  | -0.64  | 0.002   | <i>NPY6R</i>         | -3.09 | -2.22  | 0.036   |
| <i>SOAT2</i>       | 4.13  | -0.86  | 0.001   | <i>NMNAT2</i>        | -3.02 | 3.71   | 0.014   |
| <i>TRAV39</i>      | 4.03  | -0.91  | 0.012   | <i>CLDN1</i>         | -3.01 | 1.69   | 0.000   |
| <i>LGI3</i>        | 3.70  | -0.07  | 0.001   | <i>ADM2</i>          | -2.93 | 4.72   | 0.000   |
| <i>INHBB</i>       | 3.67  | 1.41   | 0.000   | <i>RIMS3</i>         | -2.91 | 2.92   | 0.002   |
| <i>RPA4</i>        | 3.56  | -2.16  | 0.006   | <i>CCND2-AS1</i>     | -2.91 | -1.15  | 0.007   |
| <i>ANKRD2</i>      | 3.48  | 1.17   | 0.002   | <i>IL32</i>          | -2.91 | 2.34   | 0.007   |
| <i>CHI3L2</i>      | 3.34  | 3.45   | 0.015   | <i>COL19A1</i>       | -2.79 | 0.34   | 0.001   |
| <i>SCARA5</i>      | 3.34  | -0.26  | 0.004   | <i>KAL1</i>          | -2.75 | 2.99   | 0.007   |
| <i>GPRC5B</i>      | 3.26  | 5.02   | 0.000   | <i>VCAN</i>          | -2.69 | 7.10   | 0.001   |
| <i>TNNT3</i>       | 3.12  | -0.91  | 0.001   | <i>CCND2-AS2</i>     | -2.69 | -1.72  | 0.032   |
| <i>POM121L9P</i>   | 3.12  | 2.50   | 0.000   | <i>IPCEF1</i>        | -2.64 | -2.20  | 0.047   |
| <i>ISM1</i>        | 3.11  | -0.30  | 0.001   | <i>VNN1</i>          | -2.63 | -1.99  | 0.034   |
| <i>NCAM1-AS1</i>   | 3.10  | -2.39  | 0.046   | <i>ARHGAP9</i>       | -2.62 | -0.48  | 0.003   |
| <i>STOX1</i>       | 3.10  | 2.24   | 0.023   | <i>RDH12</i>         | -2.57 | -1.62  | 0.012   |
| <i>MYBPHL</i>      | 3.09  | -2.40  | 0.040   | <i>MYHAS</i>         | -2.56 | -1.50  | 0.012   |
| <i>C3</i>          | 3.06  | 5.98   | 0.023   | <i>EPHA3</i>         | -2.52 | 0.55   | 0.007   |
| <i>LINC00704</i>   | 3.04  | -1.95  | 0.038   | <i>CNGA1</i>         | -2.49 | -1.82  | 0.036   |
| <i>GGT5</i>        | 3.04  | 6.46   | 0.000   | <i>ELOVL2-AS1</i>    | -2.46 | -1.70  | 0.012   |
| <i>NR0B1</i>       | 2.92  | -1.01  | 0.016   | <i>CHAC1</i>         | -2.43 | 4.19   | 0.000   |
| <i>TRPC3</i>       | 2.82  | 2.14   | 0.002   | <i>ATPIA3</i>        | -2.43 | -0.96  | 0.004   |
| <i>FAM150B</i>     | 2.80  | -0.05  | 0.040   | <i>SEMA3D</i>        | -2.42 | 1.49   | 0.026   |
| <i>EDNRB</i>       | 2.79  | 1.64   | 0.014   | <i>CTNNA3</i>        | -2.37 | 1.35   | 0.003   |
| <i>STAR</i>        | 2.76  | -1.13  | 0.002   | <i>ERICH2</i>        | -2.33 | -1.49  | 0.036   |
| <i>WSCD1</i>       | 2.74  | 0.98   | 0.034   | <i>CCND2</i>         | -2.32 | 2.26   | 0.019   |
| <i>RPL23AP81</i>   | 2.74  | -2.15  | 0.031   | <i>LPHN3</i>         | -2.30 | 2.21   | 0.043   |
| <i>ALDH1L1-AS2</i> | 2.64  | -2.19  | 0.035   | <i>INA</i>           | -2.30 | 2.04   | 0.038   |
| <i>NRCAM</i>       | 2.61  | 3.46   | 0.001   | <i>UNC5B</i>         | -2.28 | 5.69   | 0.009   |
| <i>AKR1B15</i>     | 2.60  | 0.70   | 0.009   | <i>CA3</i>           | -2.27 | -1.49  | 0.042   |
| <i>B3GNT7</i>      | 2.60  | 1.89   | 0.009   | <i>RIMS2</i>         | -2.25 | -1.14  | 0.045   |



|              |      |       |       |                  |       |       |       |
|--------------|------|-------|-------|------------------|-------|-------|-------|
| <i>SYN2</i>  | 2.60 | -0.79 | 0.002 | <i>PLXNC1</i>    | -2.23 | 2.68  | 0.003 |
| <i>PLIN5</i> | 2.59 | -1.93 | 0.041 | <i>LINC01133</i> | -2.21 | 2.67  | 0.003 |
| <i>SIX2</i>  | 2.58 | 4.07  | 0.019 | <i>LRRN4CL</i>   | -2.19 | 2.88  | 0.005 |
| <i>MTSS1</i> | 2.51 | 4.67  | 0.008 | <i>KCNS1</i>     | -2.17 | -0.42 | 0.010 |
| <i>DGKG</i>  | 2.48 | 1.57  | 0.010 | <i>KCTD16</i>    | -2.17 | 2.93  | 0.002 |
| <i>MREG</i>  | 2.47 | 2.69  | 0.001 | <i>SLC7A5</i>    | -2.14 | 6.66  | 0.004 |
| <i>SPPI</i>  | 2.45 | 0.63  | 0.000 | <i>KCNMB2</i>    | -2.12 | -1.25 | 0.033 |
| <i>HEYL</i>  | 2.44 | 2.28  | 0.039 | <i>BEX2</i>      | -2.12 | -0.68 | 0.018 |
| <i>TLE6</i>  | 2.43 | 0.12  | 0.003 | <i>CNTN6</i>     | -2.11 | 1.58  | 0.010 |

Note: *Group #5*: Uniquely expressed DEGs of GC-NR HTM cells (Group #2 minus Group #3)

**Supplementary Table S6a.** List of Enriched Pathways in Group #1

| Pathway                               | Fold Enrichment | P Value | Genes                                                                                                                                                                                                                                                                                                                                                                                                                                                                                                                                                                                                                                |
|---------------------------------------|-----------------|---------|--------------------------------------------------------------------------------------------------------------------------------------------------------------------------------------------------------------------------------------------------------------------------------------------------------------------------------------------------------------------------------------------------------------------------------------------------------------------------------------------------------------------------------------------------------------------------------------------------------------------------------------|
| Phosphatidylinositol signaling system | 1.76            | 2E-03   | <i>DGKG, PI4K2B, MTMR2, DGKE, DGKB, ITPR1, MTMR8, PIK3CD, ITPR2, PIK3CB, PIK3R1, PIK3C2A, MTMR6, MTMR7, MTM1, IMPA1, IMPA2, PPIP5K2, PIP4K2A, PLCE1, IP6K3, IPMK, INPP4B, PIKFYVE, PIK3CA, IMPAD1, PIK3C3, PLCB1, DGKI, DGKH</i>                                                                                                                                                                                                                                                                                                                                                                                                     |
| Focal adhesion                        | 1.73            | 7E-06   | <i>ITGB1, GSK3B, FLT1, ITGB4, PIK3CD, PIK3CB, ARHGAP5, ACTB, IGF1R, PPP1CB, CCND3, AKT3, CAPN2, KDR, TNR, ITGAV, VAV3, PPP1R12A, ITGA4, ITGA2, ITGA1, ACTN4, PIK3CA, COL4A4, COL4A3, COL6A6, ITGA6, COL6A5, ITGA5, PPP1R12B, TLN1, MET, CRK, SOS2, BIRC2, SHC3, LAMA2, ROCK1, ROCK2, COL11A1, LAMA3, PDGFB, XIAP, PIK3R1, MYL12A, MYL12B, MAPK8, RAPIA, CHAD, SPPI, FLNA, MYL10, FLNB, PAK2, CAV2, CAV1, LAMB4, FN1, BRAF, PTK2, ITGA10, COL5A3</i>                                                                                                                                                                                  |
| TGF-beta signaling pathway            | 1.65            | 1E-02   | <i>TGIF1, SMAD2, SMAD4, BMPR2, ROCK1, ZFYVE9, NOG, CUL1, BMP8A, INHBB, INHBA, GDF6, LTBP1, SMAD5, ACVR2B, TGFBRI, TGFBRI2, BMP2, ZFYVE16, RBL1, RPS6KB1, MYC, BMPRI1, NODAL</i>                                                                                                                                                                                                                                                                                                                                                                                                                                                      |
| p53 signaling pathway                 | 1.63            | 3E-02   | <i>GADD45B, APAF1, SERPINE1, CCNB3, CCND3, SESN3, CCNE2, RRM2B, ZMAT3, CHEK2, CASP3, CCNG2, CCNG1, CHEK1, MDM2, FAS, MDM4, ATM, ATR</i>                                                                                                                                                                                                                                                                                                                                                                                                                                                                                              |
| mTOR signaling pathway                | 1.59            | 7E-02   | <i>PRKAA1, PRKAA2, CAB39, STRADA, IRS1, PIK3CD, BRAF, TSC1, PIK3CB, PIK3R1, PIK3CA, RPS6KB1, RPS6KA2, DDIT4, AKT3, RICTOR</i>                                                                                                                                                                                                                                                                                                                                                                                                                                                                                                        |
| Cell cycle                            | 1.58            | 6E-03   | <i>CDKN1C, RB1, GSK3B, CCNH, PRKDC, CUL1, SMC3, CDC14B, CCNB3, CCND3, CHEK2, MYC, ORC3, RAD21, ORC2, CHEK1, CDC27, BUB3, BUB1, SMAD2, SMAD4, GADD45B, RBL2, CCNA1, STAG1, WEE1, RBL1, DBF4, STAG2, CCNE2, MDM2, ANAPC4, ATM, ATR</i>                                                                                                                                                                                                                                                                                                                                                                                                 |
| Adherens junction                     | 1.54            | 6E-02   | <i>SMAD2, SMAD4, YES1, INSR, ACTN4, SORBS1, IQGAP1, TGFBRI, ACTB, TGFBRI2, IGF1R, TJP1, SNAI1, SNAI2, CTNNA2, WASF1, MAP3K7, MET, WASF3</i>                                                                                                                                                                                                                                                                                                                                                                                                                                                                                          |
| Regulation of actin cytoskeleton      | 1.51            | 1E-03   | <i>ITGB1, CHRM2, NCKAP1, ITGB4, PIK3CD, PIK3CB, FGF1, FGF2, ACTB, FGF5, PPP1CB, CFL2, PIP4K2A, ITGAV, VAV3, PPP1R12A, ARHGEF12, ITGA4, ITGA2, ITGA1, ACTN4, ENAH, PIK3CA, ITGA6, ITGA5, PPP1R12B, CRK, SOS2, ARHGEF6, ROCK1, ROCK2, PDGFB, PIK3R1, IQGAP1, MYL12A, MYL12B, GNAI3, NRAS, MYL10, WASF1, PAK2, FGF22, RDX, FN1, BRAF, ARPC5, SSH2, PTK2, PIKFYVE, DIAPH2, FGF14, APC, ITGA10, KRAS, FGFR4</i>                                                                                                                                                                                                                           |
| TNF signaling pathway                 | 1.51            | 2E-02   | <i>ATF2, CEBPB, TNFAIP3, PIK3CD, PIK3CB, PIK3R1, CXCL2, MAPK8, BAG4, CASP3, AKT3, MAP3K8, DNMI1, MAP3K7, MAP3K5, EDN1, CHUK, CFLAR, FOS, TNFRSF1B, NFKBIA, ITCH, PIK3CA, TRAF5, FAS, TAB3, TAB2, BIRC2</i>                                                                                                                                                                                                                                                                                                                                                                                                                           |
| MAPK signaling pathway                | 1.48            | 7E-04   | <i>ATF2, ZAK, HSPB1, FGF1, FGF2, FGF5, MECOM, MYC, RPS6KA2, CASP3, AKT3, MAP3K8, MAP3K6, MAP3K7, MAP3K5, DUSP4, DUSP5, MEF2C, CHUK, DUSP1, CACNA2D3, CACNA2D4, FOS, TGFBRI, DUSP6, TGFBRI2, CACNB2, PPM1A, PPM1B, TRAF6, RASA1, RASA2, RAPGEF2, CRK, SOS2, PDGFB, RASGRP2, RASGRP1, CACNG8, NRAS, PPP3R1, MAPK8, RAPIA, MAPK7, NTF3, FLNA, FLNB, CD14, PAK2, MAP4K3, FGF22, MAP3K2, NTRK2, GADD45B, NFATC3, BRAF, HSPA2, PPP5C, FGF14, TAOK1, NF1, FAS, KRAS, TAB2, FGFR4</i>                                                                                                                                                        |
| Pathways in cancer                    | 1.32            | 3E-03   | <i>RB1, ITGB1, GSK3B, WNT2B, HHIP, PIK3CD, CBLB, PIK3CB, FGF1, ETS1, FGF2, IGF1R, FGF5, EDNRB, MECOM, MYC, CASP3, AKT3, ITGAV, JAK1, APPL1, ARHGEF12, CHUK, ITGA2, WNT5A, MITF, FOS, TGFBRI, TGFBRI2, MSH6, PIK3CA, CCNE2, MSH2, MSH3, COL4A4, TRAF6, COL4A3, TRAF5, AGTR1, RARB, ITGA6, PLCB1, MET, CRK, SOS2, BIRC2, LAMA2, ROCK1, ROCK2, CUL2, LAMA3, PTGER3, PDGFB, GNAI3, LPAR1, WNT8B, XIAP, PIK3R1, CBL, RASGRP2, RASGRP1, HIF1A, FOXO1, GNAI3, NRAS, MAPK8, TPR, CTNNA2, FGF22, RUNX1T1, EGLN1, SMAD2, STAT5A, SMAD4, ZBTB16, PTCH1, FZD6, LAMB4, FN1, BRAF, PTK2, NFKBIA, BMP2, FGF14, APC, GNAQ, GNB4, MDM2, FAS, KRAS</i> |

|                                                  |       |       |                                                                                                                                                                                                                                                                                                                                                                                                                                                                                                                                                                                                                      |
|--------------------------------------------------|-------|-------|----------------------------------------------------------------------------------------------------------------------------------------------------------------------------------------------------------------------------------------------------------------------------------------------------------------------------------------------------------------------------------------------------------------------------------------------------------------------------------------------------------------------------------------------------------------------------------------------------------------------|
| PI3K-Akt signaling pathway                       | 1.30  | 9E-03 | <i>ITGB1, CHRM2, ATF2, GSK3B, FLT1, IRS1, ITGB4, PIK3CD, BRCA1, PIK3CB, FGF1, FGF2, IGF1R, GHR, FGF5, CCND3, MYC, AKT3, KDR, TNF, ITGAV, JAK2, IL6R, JAK1, ITGA4, CHUK, ITGA2, ITGA1, TSC1, PRLR, RBL2, PIK3CA, CCNE2, COL4A4, COL4A3, DDIT4, MTCPI, COL6A6, ITGA6, SGK3, COL6A5, ITGA5, MET, TLR4, SOS2, TLR2, PHLPP2, PRKAA1, PRKAA2, LAMA2, COL11A1, LAMA3, PDGFB, LPAR1, PIK3R1, FOXO3, NRAS, BCL2L1, PPP2R3C, CHAD, SPP1, FGF22, MCL1, ANGPT1, INSR, LAMB4, FN1, PPP2R3A, PTK2, FGF14, RPS6KB1, ITGA10, COL5A3, GNB4, MDM2, KRAS, PKN2, FGFR4</i>                                                               |
| Cell adhesion molecules (CAMs)                   | -1.94 | 5E-10 | <i>CD86, CNTNAP2, CNTNAP1, ITGAM, ITGB2, ICAM2, F11R, ITGAL, CLDN1, PTPRF, ICAM1, SPN, CDH5, CDH3, CDH1, ITGB7, HLA-DOA, NEO1, CD34, ICOSLG, HLA-DPA1, HLA-B, HLA-C, HLA-A, HLA-F, CLDN11, CLDN6, CLDN5, CLDN4, CLDN3, CD8A, CLDN8, CLDN7, PECAM1, CDH15, HLA-DQB1, ITGA9, NLGN3, SELPLG, NLGN2, SDC4, NRXN1, SDC2, SDC3, NRXN2, GLG1, HLA-DMA, HLA-DMB, LRRC4C, HLA-DQA2, CD99, HLA-DQA1, LRRC4B, CD276, NTNG2, HLA-DRB5, VCAM1, CADM1, SELE, SELP, CD2, CD4, OCLN, PTPRC, SELL, CD6, HLA-DPB1, HLA-DRA, CNTN2, ESAM, SIGLEC1, CD22, HLA-DRB1</i>                                                                   |
| Calcium signaling pathway                        | -1.68 | 2E-07 | <i>RYR1, CHRM3, RYR2, MYLK2, CHRM1, CALML6, HTR2B, ATP2A3, ADRA1D, CALML3, ATP2A1, GRPR, ADRA1A, SLC8A2, MYLK4, PPP3CA, CYSLTR1, CYSLTR2, BDKRB2, CD38, BDKRB1, NOS1, PRKACA, PDGFRA, PRKCB, TNNC1, TACR2, AVPR1A, TACR1, ITPKB, ADCY9, LTB4R2, ADORA2B, STIM2, ORAI2, SLC25A5, PLCB2, SLC25A6, CAMK2B, PDE1B, PTGER1, PDE1A, CHRNA7, CAMK2A, PTAFR, CACNA1B, ADCY4, CACNA1A, CACNA1D, ADRB1, ADCY2, ADCY1, CACNA1E, ADCY7, CACNA1G, GNA14, HRH1, GNA15, PLN, PHKG1, ERBB3, TBXA2R, PHKG2, ERBB2, PLCG2, DRD1, NTSR1, NOS3, ATP2B3, GRIN2C, GRIN1, P2RX7, P2RX6, P2RX4, P2RX2, P2RX1, CAMK4, CALM3, PLCD3, PLCD4</i> |
| Axon guidance                                    | -1.63 | 6E-05 | <i>ROBO3, RND1, PPP3CA, RGS3, NCK2, RAC2, RAC3, PLXNC1, EPHB2, EPHB1, EPHB4, EPHB3, SEMA6B, EPHA7, SEMA6A, UNC5B, UNC5D, RHOD, EPHA1, NGEF, EPHA3, EPHA2, SEMA3D, SEMA3A, SEMA3B, SEMA3G, CXCR4, SEMA3E, SEMA3F, EFNA4, NTN3, EFNB1, PAK1, EFNB3, ABL1, PAK6, PLXNA1, SLIT3, SLIT2, SRGAP3, PAK3, LRRC4C, PAK4, NTNG2, SEMA4A, SEMA4D, NFATC2, SEMA4F, SEMA4G, EFNA1, EFNA3, CXCL12, CDK5, FES, PLXNB2</i>                                                                                                                                                                                                           |
| Inflammatory mediator regulation of TRP channels | -1.50 | 5E-03 | <i>CAMK2B, CALML6, CAMK2A, ADCY4, HTR2B, PIK3R3, CALML3, ADCY2, PIK3R2, ADCY1, ADCY7, PIK3CG, PIK3R5, ADCY5, HRH1, PLCG2, BDKRB2, BDKRB1, TRPM8, PRKACA, ASIC1, CYP2J2, NTRK1, PLA2G4F, PRKCH, PRKCB, PRKCE, PRKCD, PLA2G4C, IGF1, NGF, MAPK12, MAPK11, ADCY9, TRPV4, IL1B, F2RL1, CALM3, PLCB2</i>                                                                                                                                                                                                                                                                                                                  |
| ECM-receptor interaction                         | -1.47 | 1E-02 | <i>LAMA5, TNXB, SDC4, LAMC3, LAMA1, ITGA2B, TNC, LAMC2, THBS2, THBS4, THBS3, VTN, RELN, SV2B, SV2A, DAG1, ITGB7, ITGB6, CD36, LAMB3, COL24A1, VWF, COL1A1, COL3A1, COL1A2, COL4A2, COL5A1, ITGA11, COL4A6, COL6A3, ITGA7, AGRN, CD44, ITGA9</i>                                                                                                                                                                                                                                                                                                                                                                      |
| Wnt signaling pathway                            | -1.39 | 7E-03 | <i>FZD10, PPP3CA, FRAT2, CCND2, SOX17, RAC2, RAC3, PRKACA, MMP7, PRKCB, CTNBNBIP1, WNT9A, WNT16, DKK1, SFRP4, SFRP1, SFRP2, PLCB2, TP53, CAMK2B, CTBP1, TCF7, CAMK2A, LEF1, LRP5, CXXC4, NKD2, sFRP2, WNT11, WIF1, DVL1, TBL1Y, DVL2, DVL3, GPC4, WNT2, WNT3, WNT4, FZD1, WNT10B, WNT10A, FZD2, WNT3A, FZD7, WNT7B, FZD9, FZD8, NFATC2, NFATC1, VANGL2, BAMBI</i>                                                                                                                                                                                                                                                    |
| cAMP signaling pathway                           | -1.33 | 5E-03 | <i>RYR2, VIPR2, CHRM1, CALML6, PDE3B, CALML3, GLI1, PIK3CG, GLI3, CREB3L4, AKT2, CREB3L1, ADORA1, PDE4B, CNGA1, RAC2, RAC3, FFAR2, SOX9, PRKACA, PDE4C, NPY1R, SSTRI, ATP1B2, SSTRI, VAV1, VAV2, TIAM1, CREB3, ADCY9, RAPGEF3, CFTR, CREB5, CAMK2B, GRIA2, ADCYAP1R1, GIPR, NPRI, CAMK2A, ADCY4, PIK3R3, ATP1A3, CACNA1D, ADRB1, PIK3R2, ATP1A2, ADCY2, ADCY1, ADCY7, PIK3R5, ADCY5, PAK1, HCARI, PLN, NPY, DRD1, GRIA4, BAD, BDNF, HTR1D, ATP2B3, NFATC1, GRIN2C, GRIN2B, TSHR, GRIN1, GRIN3B, CAMK4, FXD2, CALM3</i>                                                                                               |
| Ras signaling pathway                            | -1.30 | 6E-03 | <i>CALML6, FLT4, RASGRF2, RASGRF1, CALML3, PIK3CG, FGF7, SYNGAP1, FGF9, RASSF5, AKT2, RAC2, RAC3, PRKACA, PDGFRA, PLA2G4F, KSR1, PRKCB, HGF, PLA2G4C, NGF, PGF, PLA2G16, TIAM1,</i>                                                                                                                                                                                                                                                                                                                                                                                                                                  |

---

*MRAS, KIT, RIN1, PLA1A, EPHA2, SHC2, SHC1, PLA2G1B, PDGFA, PIK3R3, PIK3R2, PLA2G5, RASAL3, EFNA4, RASGRP4, PIK3R5, PAK1, GNG4, GNG7, PDGFC, ABL1, PLCG2, PAK6, PAK3, RALGDS, PAK4, ANGPT4, NGFR, ANGPT2, EGF, BAD, PLA2G2A, VEGFB, VEGFC, IGF1, GRIN2B, GNG11, GRIN1, VEGFA, EFNA1, FGF17, EFNA3, FGF18, CALM3, GNB5, RGL1, FGF13, FGF12, FGFR3, RGL2, FGF11, FGFR2, FGF10, FGFR1*

---

Note: Group #1: The pathways enriched from DEGs between ETH and DEX-treated GC- R HTM cells; Size: Number of genes enriched. Fold enrichment is defined as the ratio of two proportions i.e. input genes/background information

**Supplementary Table S6b.** List of Enriched Pathways in Group #2.

| Pathway                               | Fold Enrichment | P Value | Genes                                                                                                                                                                                                                                                                                                                                                                                                                                                                                              |
|---------------------------------------|-----------------|---------|----------------------------------------------------------------------------------------------------------------------------------------------------------------------------------------------------------------------------------------------------------------------------------------------------------------------------------------------------------------------------------------------------------------------------------------------------------------------------------------------------|
| TNF signaling pathway                 | 1.65            | 2E-03   | <i>CEBPB, TNFAIP3, PIK3R3, CXCL1, PIK3CB, PIK3R1, CXCL3, PTGS2, CXCL2, BAG4, CASP8, RPS6KA5, CASP10, CASP3, CCL2, MAPK1, RIPK1, MAP3K8, DNMI1, MAP3K5, JUN, EDN1, MLKL, CHUK, IL15, MMP3, CFLAR, FOS, TNFRSF1B, NFKBIA, ITCH, PIK3CA, IL1B, FAS, TAB3</i>                                                                                                                                                                                                                                          |
| Cell cycle                            | 1.50            | 9E-03   | <i>CDKN1C, RB1, HDAC2, CDKN1B, PRKDC, CDC14A, ORC5, CCND3, PTTG1, YWHAQ, CHEK2, MYC, CDC26, RAD21, ORC2, CHEK1, E2F3, BUB3, SKP1, SMAD4, GADD45B, CDC25C, YWHAZ, GADD45G, RBL2, CCNA2, STAG1, WEE1, CDK7, RBL1, DBF4, CCNE2, CDK2, CDK1, MDM2, ANAPC4, MAD2L1</i>                                                                                                                                                                                                                                  |
| Steroid biosynthesis                  | 2.52            | 1E-02   | <i>CYP27B1, EBP, SOAT1, SOAT2, CYP51A1, DHCR24, CEL, DHCR7, HSD17B7, LIPA</i>                                                                                                                                                                                                                                                                                                                                                                                                                      |
| MAPK signaling pathway                | 1.29            | 2E-02   | <i>HSPB1, FGF1, RPS6KA6, RPS6KA5, MECOM, MYC, RPS6KA2, CASP3, MAP3K8, MAP3K6, MAP3K4, MAP3K5, DUSP4, PDGFRA, DUSP5, DUSP3, CHUK, DUSP1, IL1R1, PLA2G4B, RRAS2, PLA2G4A, PRKCA, FOS, MAPK8IP2, TGFBRI, DUSP6, TGFBRI, DUSP7, CACNB2, PPM1A, PPM1B, TRAF6, IL1B, RAPGEF2, RAF1, CRK, SOS2, RASGRP2, RASGRP4, CACNA1H, CACNA1G, CDC42, CACNG8, PPP3R1, RAP1A, MAPK7, FLNA, MAPK1, FLNB, MAP4K3, FGF22, NTRK2, JUN, GADD45B, BDNF, NFATC3, BRAF, HSPA2, GADD45G, PPP5C, FGF14, FAS, MAP3K13, FGFR4</i> |
| mTOR signaling pathway                | 1.65            | 3E-02   | <i>PRKAA1, PRKAA2, CAB39, CAB39L, IRS1, RPS6, PIK3R3, BRAF, PRKCA, TSC1, PIK3CB, PIK3R1, MTOR, RPS6KA6, PIK3CA, RPS6KA2, ULK2, MAPK1, RICTOR</i>                                                                                                                                                                                                                                                                                                                                                   |
| Phosphatidylinositol signaling system | 1.44            | 4E-02   | <i>DGKG, PI4K2B, MTMR2, DGKB, ITPR1, MTMR8, PIK3R3, PIK3CB, PIK3R1, MTM1, IMPA1, IMPA2, PIP4K2A, PLCE1, PLCG1, IP6K3, IPMK, ITPK1, PRKCA, OCRL, INPP4B, SYNJI, PIK3CA, IMPAD1, PIK3C3, CALM1, DGKI, DGKH</i>                                                                                                                                                                                                                                                                                       |
| Vascular smooth muscle contraction    | 1.38            | 5E-02   | <i>GUCY1B3, RAMP2, ROCK1, ROCK2, NPR1, ITPR1, ADCY3, ADCY2, ADRA1B, ACTG2, PPP1CB, PPP1CC, KCNMB3, MAPK1, PPP1R14A, PTGIR, PLA2G4B, PLA2G4A, PRKCA, BRAF, ACTA2, ADORA2A, ADORA2B, GNAQ, KCNMA1, AGTR1, MRV1, RAF1, CALM1, PPP1R12B, RAMP1, PPP1R12C</i>                                                                                                                                                                                                                                           |
| VEGF signaling pathway                | 1.49            | 8E-02   | <i>PLA2G4B, PXN, NFATC2, PLA2G4A, HSPB1, PIK3R3, PRKCA, PIK3CB, PIK3R1, PTGS2, PTK2, CDC42, PPP3R1, PIK3CA, KDR, MAPK1, PLCG1, RAF1</i>                                                                                                                                                                                                                                                                                                                                                            |
| TGF-beta signaling pathway            | 1.38            | 1E-01   | <i>TGIF1, SMAD4, ROCK1, ZFYVE9, NOG, BMP8A, SMAD9, INHBB, GDF5, LTBP1, ACVR2B, DCN, TGFBRI, BMP6, TGFBRI, GDF7, PPP2CA, BMP2, RBL1, PPP2R1B, MYC, MAPK1, SKP1</i>                                                                                                                                                                                                                                                                                                                                  |
| ECM-receptor interaction              | -2.37           | 5E-09   | <i>LAMA5, TNXB, LAMA2, SDC4, LAMA1, ITGA2B, TNC, LAMC2, THBS2, THBS4, THBS3, COMP, VTN, RELN, SV2A, DAG1, TNR, ITGB8, ITGB6, CD36, COL27A1, LAMB3, LAMB2, ITGA3, HSPG2, COL1A1, COL3A1, COL1A2, COL4A2, COL5A1, COL4A1, COL6A2, COL5A2, COL6A1, ITGA11, ITGA8, COL4A5, COL6A3, ITGA7, COL6A6, COL6A5, AGRN, CD44, ITGA9</i>                                                                                                                                                                        |
| Axon guidance                         | -2.14           | 2E-09   | <i>SEMA5A, ROBO3, LRRC4, RND1, RGS3, NCK2, RAC2, RAC3, PLXNC1, EPHB2, HRAS, EPHB1, EPHB4, EPHB3, SEMA6B, EPHA5, UNC5B, EPHA8, UNC5C, UNC5D, RHOD, RASA1, MET, NGEF, EPHA3, EPHA2, SEMA3D, SEMA3B, NTN4, SEMA3E, SEMA3F, EFNA4, NTN3, GNAI2, EFNB2, EFNB1, PAK1, EFNB3, ABL1, PAK6, PLXNA1, SLIT3, FYN, SRGAP3, PAK3, SRGAP2, LRRC4C, NTNG1, NTNG2, SEMA4A, LIMK1, SEMA4F, SEMA4G, L1CAM, EFNA3, CXCL12, PLXNB3, PLXNB2</i>                                                                         |
| ABC transporters                      | -1.81           | 2E-02   | <i>ABCD4, ABCA2, ABCD2, ABCB1, ABCA3, ABCB4, TAP2, TAP1, ABCA7, ABCC9, ABCB9, ABCB11, ABCA12, ABCC11, ABCA13, ABCG1, CFTR</i>                                                                                                                                                                                                                                                                                                                                                                      |
| Notch signaling pathway               | -1.75           | 2E-02   | <i>JAG2, NUMBL, JAG1, CTBP1, PSEN2, DTX1, DTX2, RFNG, DLL1, DLL3, APH1A, DLL4, LFNG, NCSTN, DVLI, DVL2, DVL3, HES5</i>                                                                                                                                                                                                                                                                                                                                                                             |

|                                                  |       |       |                                                                                                                                                                                                                                                                                                                                                                                                                                                                                                                                                                                                                                                                                                                                                       |
|--------------------------------------------------|-------|-------|-------------------------------------------------------------------------------------------------------------------------------------------------------------------------------------------------------------------------------------------------------------------------------------------------------------------------------------------------------------------------------------------------------------------------------------------------------------------------------------------------------------------------------------------------------------------------------------------------------------------------------------------------------------------------------------------------------------------------------------------------------|
| Cell adhesion molecules (CAMs)                   | -1.71 | 4E-05 | <i>CNTNAP2, CNTNAP1, ITGB2, ICAM2, LRRC4, ITGAL, PVR, CLDN1, PTPRF, ICAM1, CDH5, CDH3, CDH2, CDH1, MPZ, ITGB8, NEO1, CD34, HLA-B, HLA-C, HLA-A, HLA-F, VCAN, CLDN7, ITGA8, CDH15, ITGA9, NLGN3, SELPLG, NLGN2, SDC4, NRXN1, SDC2, SDC3, NRXN2, GLG1, HLA-DMA, LRRC4C, CD99, JAM2, LRRC4B, CD276, NTNG1, NTNG2, CADM3, VCAM1, CADM1, L1CAM, CD4, OCLN, PTPRC, SIGLEC1</i>                                                                                                                                                                                                                                                                                                                                                                              |
| Gap junction                                     | -1.65 | 4E-03 | <i>ADCY4, HTR2B, HTR2A, ADCY1, ADCY8, ADCY7, GRM1, GNAI2, ADCY5, TUBA1C, TUBB6, GRM5, TUBA1A, TUBB3, PDGFC, PRKACA, HRAS, PRKG1, MAP2K5, GUCY1A3, GUCY1A2, MAP2K1, PRKCB, EGF, TUBB, PLCB4, ADCY9, GNAS, GRB2, SOS1, PLCB2</i>                                                                                                                                                                                                                                                                                                                                                                                                                                                                                                                        |
| Inflammatory mediator regulation of TRP channels | -1.57 | 6E-03 | <i>CALML6, CAMK2A, ADCY4, HTR2B, PIK3R2, HTR2A, ADCY1, ADCY8, ADCY7, ADCY5, PLCG2, BDKRB2, BDKRB1, PRKACA, MAP2K6, ASIC1, MAP2K3, NTRK1, PRKCH, PRKCB, PRKCE, PLA2G4C, IGF1, NGF, MAPK10, MAPK11, PLCB4, ADCY9, TRPV4, GNAS, PRKCQ, PLCB2, CALM2</i>                                                                                                                                                                                                                                                                                                                                                                                                                                                                                                  |
| Long-term depression                             | -1.48 | 7E-02 | <i>GUCY1A3, GUCY1A2, GRIA2, GNAZ, MAP2K1, GRID2, PRKCB, PLA2G4C, CACNA1A, IGF1, GRM1, GNAI2, PLCB4, GNAI2, GNAS, HRAS, PLCB2, GRIA3, PRKG1</i>                                                                                                                                                                                                                                                                                                                                                                                                                                                                                                                                                                                                        |
| Ras signaling pathway                            | -1.43 | 1E-03 | <i>CALML6, RASGRF2, ELK1, FGF7, RASSF5, RAC2, RAC3, PRKACA, HRAS, MAP2K1, KSR1, PRKCB, HGF, PLA2G4C, NGF, PLA2G16, TIAM1, MRAS, RASA1, KIT, SOS1, MET, PLA1A, EPHA2, SHC4, SHC2, SHC1, PLA2G1B, PIK3R2, PLD1, RASGRP1, EFNA4, RELA, RASGRP3, PAK1, GNG4, GNG7, PDGFC, ABL1, PLCG2, PAK6, PAK3, RALGDS, ANGPT4, NGFR, ANGPT2, EGF, BAD, VEGFB, VEGFC, IGF1, GRIN2B, GNG11, NFKB1, VEGFA, MAPK10, FGF17, EFNA3, KITLG, FGF18, GRB2, GNB5, TEK, CALM2, FGF12, FGFR3, RGL2, FGFR2, FGFR1</i>                                                                                                                                                                                                                                                              |
| PI3K-Akt signaling pathway                       | -1.42 | 5E-05 | <i>EPO, ITGA2B, TNC, COMP, STK11, FGF7, CCND2, CCND1, CREB3L4, CREB3L1, TNF, IFNAR2, MAP2K1, COL27A1, IL4R, HGF, F2R, COL4A2, COL4A1, DDIT4, COL4A5, MTCP1, TP53, EPHA2, ATF4, PIK3R2, EFNA4, VTN, PDGFC, EIF4EBP1, PCK2, NGFR, IGF1, GNG11, NFKB1, FGF17, COL1A1, EFNA3, IL6, CDK6, COL1A2, COL5A1, IL7, CDK4, COL5A2, ITGA11, FGF18, GRB2, GNB5, IL7R, FGF12, FGFR3, FGFR2, FGFR1, CDKN1A, LAMC2, CASP9, MLST8, ITGB8, ITGB6, JAK3, HRAS, ITGA3, NGF, CREB3, COL6A2, COL6A1, KIT, ITGA8, COL6A3, ITGA7, COL6A6, COL6A5, SOS1, MET, ITGA9, CREB5, LAMA5, PHLPP1, TNXB, LAMA2, ATF6B, LAMA1, THBS2, RELA, THBS4, THBS3, RELN, GNG4, GNG7, ANGPT4, ANGPT2, LAMB3, BAD, LAMB2, EGF, VEGFB, VEGFC, PPP2R3B, VEGFA, COL3A1, KITLG, TEK, PKN1, PIK3AP1</i> |
| cGMP-PKG signaling pathway                       | -1.42 | 8E-03 | <i>ATF6B, CALML6, ADCY4, ATP1A4, ATP2A3, ATP1A3, ATP1A2, ADRB2, ADCY1, ADCY8, ADCY7, SLC8A1, GNAI2, ADCY5, CREB3L4, CREB3L1, KCNMB2, GNAI2, ADORA1, CNGA1, BDKRB2, KCNMB4, CACNA1S, PRKG1, GUCY1A3, GUCY1A2, MAP2K1, MEF2C, KCNJ8, BAD, PRKCE, PDE2A, ATP2B3, ATP2B1, ADRA2B, ADRA2A, CREB3, KCNU1, PLCB4, ADCY9, PDE3A, PDE5A, SLC25A5, PLCB2, CALM2, ATF4, SLC25A6, CREB5</i>                                                                                                                                                                                                                                                                                                                                                                       |
| Calcium signaling pathway                        | -1.38 | 9E-03 | <i>CHRM3, RYR2, CALML6, CHRM5, HTR2B, ATP2A3, HTR2A, HTR4, SLC8A1, GRM1, GRM5, CYSLTR2, BDKRB2, BDKRB1, PRKACA, PRKCB, TNNC1, TNNC2, F2R, TACR1, ITPKB, PLCB4, ADCY9, ITPKA, ORA12, SLC25A5, PLCB2, SLC25A6, PTGER1, PDE1A, CAMK2A, ADCY4, CACNA1A, ADRB2, ADCY1, ADCY8, CACNA1E, ADCY7, GNAI4, PHKG1, ERBB3, TBXA2R, PLCG2, CACNA1S, ATP2B3, ATP2B1, P2RX7, P2RX6, P2RX4, GNAS, PLCD3, CALM2, PLCD4</i>                                                                                                                                                                                                                                                                                                                                              |
| Regulation of actin cytoskeleton                 | -1.25 | 5E-02 | <i>CYFIP2, CHRM3, ARPC1B, ITGA2B, ITGB2, CHRM5, ARPC5L, ITGAL, FGF7, BDKRB2, RAC2, BDKRB1, ITGB8, RAC3, PIP4K2B, ITGB6, HRAS, APC2, MAP2K1, ITGA3, INSRR, F2R, VAV2, TIAM1, MRAS, ITGA8, PFN4, ARHGEF4, ITGA7, SOS1, ITGA9, PFN2, PIK3R2, IQGAP2, IQGAP3, FGD1, PAK1, GNAI2, PDGFC, PIP5K1A, PAK6, NCKAP1L, PAK3, EGF, LIMK1, BAIAP2, SSH3, MYLPF, FGF17, DIAPH3, ITGA11, FGF18, FGF12, FGFR3, FGFR2, FGFR1</i>                                                                                                                                                                                                                                                                                                                                       |

Note: Group #2: The pathways Enriched from DEGs between ETH and DEX-treated GC- NR HTM cells; Size: Number of genes enriched.

**Supplementary Table S6c.** List of Enriched Pathways in Group #3.

| Pathway                               | Fold Enrichment | P Value | Genes                                                                                                                                                                                                                                                                                                                                                                                             |
|---------------------------------------|-----------------|---------|---------------------------------------------------------------------------------------------------------------------------------------------------------------------------------------------------------------------------------------------------------------------------------------------------------------------------------------------------------------------------------------------------|
| Focal adhesion                        | 1.86            | 1E-04   | <i>FLT1, SHC3, ROCK1, ROCK2, ITGB4, COL11A1, LAMA3, XIAP, PIK3CB, PIK3R1, MYL12A, ACTB, MYL12B, PPP1CB, CCND3, RAPIA, KDR, SPP1, CAPN2, FLNA, MYL10, FLNB, VAV3, ITGA4, CAV2, CAV1, ITGA2, LAMB4, BRAF, PTK2, PIK3CA, ITGA10, COL4A4, COL4A3, ITGA6, ITGA5, PPP1R12B, TLN1, CRK, SOS2</i>                                                                                                         |
| Phosphatidylinositol signaling system | 2.05            | 2E-03   | <i>DGKG, PI4K2B, MTMR2, DGKB, IPMK, ITPR1, MTMR8, PIK3CB, PIK3R1, MTM1, INPP4B, PIK3CA, IMPA1, IMPA2, IMPAD1, PIP4K2A, PLCE1, PIK3C3, IP6K3, DGKI, DGKH</i>                                                                                                                                                                                                                                       |
| MAPK signaling pathway                | 1.59            | 2E-03   | <i>HSPB1, FGF1, RASGRP2, CACNG8, PPP3R1, RAPIA, MAPK7, MECOM, MYC, CASP3, RPS6KA2, FLNA, FLNB, MAP3K8, MAP3K6, MAP4K3, FGF22, MAP3K5, DUSP4, NTRK2, DUSP5, GADD45B, CHUK, DUSP1, NFATC3, BRAF, HSPA2, FOS, TGFBRI, DUSP6, TGFB2, CACNB2, PPM1A, PPP5C, PPM1B, FGF14, TRAF6, RAPGEF2, FAS, FGFR4, CRK, SOS2</i>                                                                                    |
| Pathways in cancer                    | 1.39            | 8E-02   | <i>RB1, WNT2B, PIK3CB, FGF1, ETS1, EDNRB, MECOM, MYC, CASP3, JAK1, CHUK, ITGA2, WNT5A, MITF, FOS, TGFBRI, TGFB2, MSH6, PIK3CA, CCNE2, COL4A4, TRAF6, COL4A3, AGTR1, RARB, ITGA6, CRK, SOS2, ROCK1, ROCK2, LAMA3, GNAI3, LPAR1, WNT8B, XIAP, PIK3R1, CBL, RASGRP2, HIF1A, FOXO1, FGF22, STAT5A, SMAD4, ZBTB16, PTCH1, FZD6, LAMB4, BRAF, PTK2, NFKBIA, BMP2, FGF14, APC, GNAQ, GNB4, MDM2, FAS</i> |
| TNF signaling pathway                 | 1.79            | 1E-02   | <i>EDN1, CEBPB, CHUK, TNFAIP3, CFLAR, PIK3CB, PIK3R1, FOS, TNFRSF1B, CXCL2, NFKBIA, ITC, BAG4, PIK3CA, CASP3, FAS, TAB3, MAP3K8, DNM1L, MAP3K5</i>                                                                                                                                                                                                                                                |
| p53 signaling pathway                 | 2.00            | 2E-02   | <i>GADD45B, APAF1, SERPINE1, CCND3, SESN3, CCNE2, CHEK2, CASP3, CCNG2, CCNG1, CHEK1, MDM2, FAS, MDM4</i>                                                                                                                                                                                                                                                                                          |
| Drug metabolism - cytochrome P450     | 1.97            | 2E-02   | <i>MAOA, ADH1B, ADH1A, MGST1, FMO2, FMO3, FMO4, FMO5, ADH5, ADH6, ADH4, CYP2A6, ALDH3B1, AOX1</i>                                                                                                                                                                                                                                                                                                 |
| Adipocytokine signaling pathway       | 1.91            | 3E-02   | <i>PRKAA1, PRKAB2, PRKAA2, CHUK, ACSL1, IRS1, PRKAG2, IRS2, PTPN11, TNFRSF1B, NFKBIA, ACSBG1, JAK2, PPARA</i>                                                                                                                                                                                                                                                                                     |
| Regulation of actin cytoskeleton      | 1.46            | 3E-02   | <i>ROCK1, ROCK2, ITGB4, PIK3CB, PIK3R1, FGF1, MYL12A, ACTB, MYL12B, PPP1CB, MYL10, PIP4K2A, FGF22, VAV3, ITGA4, ITGA2, BRAF, ARPC5, SSH2, PTK2, ENAH, DIAPH2, FGF14, APC, PIK3CA, ITGA10, ITGA6, ITGA5, FGFR4, PPP1R12B, CRK, SOS2</i>                                                                                                                                                            |
| Thyroid hormone signaling pathway     | 1.58            | 5E-02   | <i>NCOA2, MED1, NCOA3, SLC16A10, PIK3CB, PIK3R1, ATP1B1, ESR1, HIF1A, FOXO1, ACTB, MED13L, MED14, NCOR1, PIK3CA, TBC1D4, MYC, MDM2, PLCE1</i>                                                                                                                                                                                                                                                     |
| Cell cycle                            | 1.54            | 5E-02   | <i>CDKN1C, RB1, SMAD4, GADD45B, PRKDC, RBL2, CCND3, STAG1, WEE1, RBL1, DBF4, CCNE2, CHEK2, MYC, RAD21, ORC2, CHEK1, MDM2, ANAPC4, BUB3</i>                                                                                                                                                                                                                                                        |
| mTOR signaling pathway                | 1.81            | 8E-02   | <i>PRKAA1, PRKAA2, CAB39, PIK3CA, IRS1, RPS6KA2, TSC1, BRAF, RICTOR, PIK3CB, PIK3R1</i>                                                                                                                                                                                                                                                                                                           |
| PI3K-Akt signaling pathway            | 1.25            | 9E-02   | <i>PRKAA1, FLT1, PRKAA2, IRS1, ITGB4, COL11A1, LAMA3, LPAR1, BRCA1, PIK3CB, PIK3R1, FOXO3, FGF1, CCND3, BCL2L11, MYC, KDR, SPP1, JAK2, IL6R, FGF22, JAK1, MCL1, ANGPT1, ITGA4, CHUK, ITGA2, INSR, LAMB4, TSC1, PRLR, PTK2, RBL2, FGF14, PIK3CA, CCNE2, ITGA10, COL4A4, COL4A3, GNB4, MDM2, ITGA6, ITGA5, FGFR4, SOS2</i>                                                                          |
| TGF-beta signaling pathway            | 1.59            | 9E-02   | <i>TGIF1, SMAD4, ROCK1, ZFYVE9, NOG, BMP8A, INHBB, LTBP1, ACVR2B, TGFBRI, TGFB2, BMP2, RBL1, MYC</i>                                                                                                                                                                                                                                                                                              |
| Axon guidance                         | -2.25           | 5E-07   | <i>ROBO3, SEMA3D, SEMA3B, SEMA3E, SEMA3F, EFNA4, RND1, NTN3, EFNBI, PAK1, EFNBI, RGS3, ABL1, NCK2, RAC2, PAK6, PLXNA1, RAC3, SLIT3, PLXNC1, SRGAP3, EPHB2, PAK3, LRRC4C, EPHB1, EPHB4, EPHB3, SEMA6B, NTNG2, SEMA4A, UNC5B, SEMA4F, UNC5D, SEMA4G, RHOD, EFNA3, CXCL12, PLXNB2, EPHA3, NGEF, EPHA2</i>                                                                                            |

|                                                  |       |       |                                                                                                                                                                                                                                                                                                                                                                 |
|--------------------------------------------------|-------|-------|-----------------------------------------------------------------------------------------------------------------------------------------------------------------------------------------------------------------------------------------------------------------------------------------------------------------------------------------------------------------|
| Cell adhesion molecules (CAMs)                   | -2.01 | 1E-05 | NLGN3, CNTNAP2, CNTNAP1, SELPLG, NLGN2, SDC4, NRXN1, SDC2, SDC3, ITGB2, ICAM2, NRXN2, ITGAL, CLDN1, PTPRF, GLG1, ICAM1, CDH5, HLA-DMA, CDH3, CDH1, LRRC4C, NEO1, CD34, CD99, LRRC4B, CD276, NTNG2, VCAM1, CADM1, HLA-B, HLA-C, HLA-A, HLA-F, CD4, OCLN, PTPRC, CLDN7, SIGLEC1, CDH15, ITGA9                                                                     |
| ECM-receptor interaction                         | -2.24 | 5E-05 | LAMA5, TNXB, SDC4, LAMA1, ITGA2B, TNC, LAMC2, THBS2, THBS4, THBS3, VTN, RELN, SV2A, DAG1, ITGB6, CD36, LAMB3, COL1A1, COL3A1, COL1A2, COL4A2, COL5A1, ITGA11, COL6A3, ITGA7, AGRN, CD44, ITGA9                                                                                                                                                                  |
| Ras signaling pathway                            | -1.60 | 5E-04 | CALML6, RASGRF2, FGF7, RASSF5, RAC2, RAC3, PRKACA, KSR1, PRKCB, HGF, PLA2G4C, NGF, PLA2G16, TIAM1, MRAS, KIT, PLA1A, EPHA2, SHC2, SHC1, PLA2G1B, PIK3R2, EFNA4, PAK1, GNG4, GNG7, PDGFC, ABL1, PLCG2, PAK6, PAK3, RALGDS, ANGPT4, NGFR, ANGPT2, EGF, BAD, VEGFB, VEGFC, IGF1, GRIN2B, GNG11, VEGFA, FGF17, EFNA3, FGF18, GNB5, FGF12, FGFR3, RGL2, FGFR2, FGFR1 |
| Aldosterone synthesis and secretion              | -1.98 | 2E-03 | SCARB1, DAGLA, CAMK1D, CALML6, PRKCB, PRKCE, CAMK2A, PDE2A, ADCY4, ADCY1, ADCY7, ADCY5, CREB3, ADCY9, CREB3L4, CYP11A1, CREB3L1, CAMK1, PRKACA, PLCB2, CAMK1G, CREB5, ATF4                                                                                                                                                                                      |
| Thyroid hormone synthesis                        | -1.99 | 4E-03 | GPX1, HSPA5, PRKCB, ADCY4, GPX7, ATP1A3, ATP1A2, ADCY1, ADCY7, TSHR, PDIA4, ADCY5, CREB3, ADCY9, CREB3L4, CREB3L1, PRKACA, PLCB2, CREB5, ATF4                                                                                                                                                                                                                   |
| Inflammatory mediator regulation of TRP channels | -1.70 | 1E-02 | NTRK1, PRKCH, CALML6, PRKCB, PRKCE, CAMK2A, PLA2G4C, ADCY4, HTR2B, PIK3R2, ADCY1, IGF1, NGF, ADCY7, ADCY5, MAPK11, ADCY9, TRPV4, BDKRB2, PLCG2, BDKRB1, PRKACA, PLCB2, ASIC1                                                                                                                                                                                    |
| Notch signaling pathway                          | -2.03 | 2E-02 | JAG2, CTBP1, PSEN2, DTX1, DTX2, RFNG, DLL1, DLL3, APH1A, DLL4, LFNG, DVL1, DVL2, DVL3                                                                                                                                                                                                                                                                           |
| Glycine, serine and threonine metabolism         | -2.14 | 2E-02 | GAMT, AOC3, AOC2, PSAT1, SHMT2, CHDH, PGAM1, SARDH, PHGDH, SDSL, ALDH7A1, PSPH                                                                                                                                                                                                                                                                                  |
| Calcium signaling pathway                        | -1.44 | 2E-02 | CHRM3, RYR2, PTGER1, CALML6, PDE1A, CAMK2A, ADCY4, HTR2B, ATP2A3, CACNA1A, ADCY1, CACNA1E, ADCY7, GNA14, CYSLTR2, PHKG1, ERBB3, TBXA2R, PLCG2, BDKRB2, BDKRB1, PRKACA, PRKCB, TNNC1, ATP2B3, TACR1, P2RX7, ITPKB, P2RX6, P2RX4, ADCY9, ORAI2, PLCD3, SLC25A5, PLCD4, PLCB2, SLC25A6                                                                             |
| Protein processing in endoplasmic reticulum      | -1.44 | 2E-02 | RPN2, PRKCSH, RPN1, RRP1, HERPUD1, SEC61A1, GANAB, OS9, LMAN2, MAN1C1, FBXO6, BAK1, SIL1, UBQLN4, TXNDC5, PDIA3, SSR4, HSPA5, WFS1, SSR2, FBXO2, HSPA6, UBE2E2, TRAF2, CKAP4, DDOST, PDIA4, DNAJC5, DDIT3, ERP29, HYOU1, P4HB, CALR, MAN1B1, ATF4                                                                                                               |
| Wnt signaling pathway                            | -1.46 | 3E-02 | CTBP1, TCF7, LEF1, CAMK2A, LRP5, FZD10, FRAT2, WNT11, CCND2, DVL1, DVL2, RAC2, DVL3, RAC3, PRKACA, WNT2, WNT3, WNT4, WNT10B, FZD2, PRKCB, FZD7, CTNNBIP1, FZD8, WNT9A, SFRP4, VANGL2, PLCB2, TP53                                                                                                                                                               |
| ABC transporters                                 | -1.74 | 9E-02 | ABCA2, ABCB1, ABCA3, ABCB4, TAP2, TAP1, ABCA7, ABCB9, ABCC11, ABCG1, CFTR                                                                                                                                                                                                                                                                                       |

Note: Group #3: The pathways Enriched from the overlapping DEGs between Group #1 and Group #2; Size: Number of genes enriched.



**Supplementary Table S6d.** List of Enriched Pathways in Group #4.

| Pathway                                     | Fold Enrichment | P Value | Genes                                                                                                                                                                                                                                                                                                                           |
|---------------------------------------------|-----------------|---------|---------------------------------------------------------------------------------------------------------------------------------------------------------------------------------------------------------------------------------------------------------------------------------------------------------------------------------|
| Axon guidance                               | 1.94            | 1E-02   | <i>ITGB1, GSK3B, SEMA7A, ARHGEF12, SEMA3C, LRRC4, NTN4, UNC5C, NRAS, RASA1, DPYSL2, CFL2, KRAS, PAK2, MET, SRGAP1, NCK1</i>                                                                                                                                                                                                     |
| Regulation of actin cytoskeleton            | 1.59            | 3E-02   | <i>ITGB1, CHRM2, NCKAP1, ARHGEF12, PPP1R12A, RDX, ITGA1, PDGFB, FN1, PIK3CD, ACTN4, IQGAP1, FGF2, FGF5, GNAI3, PIKFYVE, NRAS, CFL2, ITGAV, KRAS, WASF1, PAK2, ARHGEF6</i>                                                                                                                                                       |
| ECM-receptor interaction                    | 2.00            | 3E-02   | <i>ITGB1, LAMA2, COL5A3, ITGA1, CHAD, FN1, TNF, SDC1, COL6A6, ITGAV, GPIBA, COL6A5</i>                                                                                                                                                                                                                                          |
| Focal adhesion                              | 1.55            | 5E-02   | <i>ITGB1, GSK3B, PPP1R12A, LAMA2, ITGA1, PDGFB, FN1, PIK3CD, ACTN4, ARHGAP5, IGF1R, MAPK8, COL5A3, CHAD, AKT3, TNF, COL6A6, ITGAV, COL6A5, PAK2, MET, BIRC2</i>                                                                                                                                                                 |
| PI3K-Akt signaling pathway                  | 1.39            | 5E-02   | <i>ITGB1, CHRM2, PHLPP2, ATF2, GSK3B, LAMA2, PDGFB, PIK3CD, FGF2, IGF1R, GHR, FGF5, NRAS, PPP2R3C, CHAD, AKT3, TNF, ITGAV, ITGA1, FN1, PPP2R3A, RPS6KB1, COL5A3, DDIT4, MTCPI, KRAS, PKN2, COL6A6, SGK3, COL6A5, MET, TLR4, TLR2</i>                                                                                            |
| Adherens junction                           | 2.04            | 5E-02   | <i>SMAD2, TJP1, YES1, ACTN4, CTNNA2, IQGAP1, WASF1, MAP3K7, MET, IGF1R</i>                                                                                                                                                                                                                                                      |
| Protein processing in endoplasmic reticulum | 1.54            | 7E-02   | <i>SEC23A, SEC24A, SAR1B, SEL1L, CUL1, EIF2AK2, YOD1, EIF2S1, UBE2J1, DNAJC3, MAPK8, HSPH1, MAN1A2, MAN1A1, UGGT2, SEC62, ATF6, MBTPS2</i>                                                                                                                                                                                      |
| T cell receptor signaling pathway           | 1.74            | 8E-02   | <i>GSK3B, DLG1, NRAS, AKT3, PIK3CD, KRAS, MAP3K7, PAK2, RASGRP1, LAT, MALTI, NCK1</i>                                                                                                                                                                                                                                           |
| Cell cycle                                  | 1.64            | 8E-02   | <i>SMAD2, GSK3B, CCNH, CUL1, SMC3, CDC14B, CCNB3, CCNA1, STAG2, ORC3, CDC27, ATM, BUB1, ATR</i>                                                                                                                                                                                                                                 |
| Calcium signaling pathway                   | -1.98           | 1E-05   | <i>CAMK2B, RYR1, MYLK2, CHRM1, PDE1B, CHRNA7, PTAFR, CACNA1B, CACNA1D, ADRA1D, ADRB1, ATP2A1, CALML3, ADCY2, GRPR, ADRA1A, SLC8A2, CACNA1G, MYLK4, PPP3CA, HRH1, GNAI5, CYSLTR1, PLN, PHKG2, ERBB2, CD38, DRD1, NOS1, NTSR1, PDGFRA, NOS3, TACR2, AVPR1A, GRIN2C, GRIN1, LTB4R2, ADORA2B, STIM2, P2RX2, P2RX1, CAMK4, CALM3</i> |
| Type I diabetes mellitus                    | -3.33           | 1E-05   | <i>CD86, HLA-DRB5, PTPRN2, PTPRN, GAD1, PRF1, HLA-DMB, IL1B, HLA-DPB1, HLA-DRA, IL12A, HLA-DOA, HLA-DQA2, HLA-DQA1, HLA-DRB1, HLA-DPA1, HLA-DQB1</i>                                                                                                                                                                            |
| Cell adhesion molecules (CAMs)              | -1.85           | 7E-04   | <i>CD86, ITGAM, F11R, SPN, HLA-DMB, ITGB7, HLA-DOA, HLA-DQA2, ICOSLG, HLA-DQA1, HLA-DPA1, HLA-DRB5, SELE, SELP, CLDN11, CD2, CLDN6, CLDN5, CLDN4, CLDN3, SELL, CD6, CD8A, CLDN8, HLA-DPB1, PECAM1, HLA-DRA, CNTN2, ESAM, CD22, HLA-DRB1, HLA-DQB1</i>                                                                           |
| B cell receptor signaling pathway           | -2.03           | 7E-03   | <i>LYN, SYK, NFATC2, PIK3R3, NFATC1, PIK3CG, VAV1, PIK3R5, CD79B, CD79A, PPP3CA, AKT2, BLNK, PTPN6, FCGR2B, CD22, CARD11</i>                                                                                                                                                                                                    |
| TNF signaling pathway                       | -1.69           | 2E-02   | <i>MLKL, RIPK3, IL15, MMP3, LIF, PIK3R3, CXCL1, CXCL3, SELE, MMP9, PIK3CG, MAPK12, PIK3R5, TNFRSF1A, CXCL10, SOCS3, CASP10, IL1B, AKT2, CCL5, CCL2, PGAM5</i>                                                                                                                                                                   |
| Chemokine signaling pathway                 | -1.37           | 6E-02   | <i>CCL14, CCL13, CXCL6, GSK3A, CXCL9, NCF1, WAS, CXCR4, PIK3R3, CXCL1, ADCY2, ARRB2, CXCL13, CXCL3, CXCL14, PIK3CG, PIK3R5, PREX1, AKT2, CCL5, CCL2, CCL19, CCR1, LYN, PRKCD, VAV1, FGR, CXCL10, HCK, CXCL11, CCL26</i>                                                                                                         |

Note: Group #4: Uniquely expressed GC-R HTM cells specific pathways enriched from DEGs of Group #3 minus Group #1; Size: Number of genes enriched.

**Supplementary Table S6e.** List of Enriched Pathways in Group #5.

| Pathway                                          | Fold Enrichment | P Value | Genes                                                                                                                                                                                                                                                                      |
|--------------------------------------------------|-----------------|---------|----------------------------------------------------------------------------------------------------------------------------------------------------------------------------------------------------------------------------------------------------------------------------|
| Long-term depression                             | 2.31            | 9E-03   | <i>RYR1, GUCY1B3, PLA2G4B, PLA2G4A, PRKCA, GNAI1, PPP2CA, GNAO1, PPP2R1B, PRKG2, MAPK1, NOS1, RAF1</i>                                                                                                                                                                     |
| Vascular smooth muscle contraction               | 1.82            | 1E-02   | <i>GUCY1B3, PTGIR, RAMP2, NPR1, PLA2G4B, PLA2G4A, ADCY3, PRKCA, ADCY2, ACTG2, PPP1CC, ADORA2A, ADORA2B, KCNMA1, MAPK1, MRV11, CALM1, RAF1, PPP1R12C, RAMP1</i>                                                                                                             |
| Inflammatory mediator regulation of TRP channels | 1.85            | 2E-02   | <i>PTGER4, IL1R1, PTGER2, PLA2G4B, PLA2G4A, ADCY3, TRPV3, PIK3R3, PRKCA, ADCY2, ALOX12, PPP1CC, IL1B, F2RL1, PLCG1, CALM1, ASIC3</i>                                                                                                                                       |
| Fatty acid metabolism                            | 2.22            | 3E-02   | <i>CPT1A, FASN, OXSM, ACSL6, ACSL5, ELOVL6, HADH, CPT1B, ACAT2, ACAT1</i>                                                                                                                                                                                                  |
| VEGF signaling pathway                           | 1.92            | 6E-02   | <i>CDC42, PLA2G4B, PXN, NFATC2, PIK3R3, PLA2G4A, MAPK1, PRKCA, PLCG1, RAF1, PTGS2</i>                                                                                                                                                                                      |
| Oxytocin signaling pathway                       | 1.49            | 7E-02   | <i>RYR1, GUCY1B3, JUN, NPR1, PLA2G4B, KCNJ14, NFATC2, PLA2G4A, ADCY3, PRKCA, ADCY2, PTGS2, GNAI1, GNAO1, PPP1CC, RGS2, CAMK4, MAPK1, CALM1, RAF1, PPP1R12C</i>                                                                                                             |
| Calcium signaling pathway                        | 1.43            | 7E-02   | <i>RYR1, PDGFRA, PTGFR, PDE1C, ATP2A2, ADCY3, ATP2A1, PRKCA, ADCY2, GRIN2C, CACNA1H, SLC8A2, CACNA1G, PLN, GNAL, STIM1, ADORA2A, ADORA2B, CAMK4, P2RX1, VDAC3, NOS1, PLCG1, CALM1</i>                                                                                      |
| ECM-receptor interaction                         | -2.62           | 9E-04   | <i>COL27A1, LAMA2, LAMB2, ITGA3, HSPG2, COMP, COL4A1, COL6A2, COL5A2, COL6A1, ITGA8, COL4A5, TNF, ITGB8, COL6A6, COL6A5</i>                                                                                                                                                |
| Focal adhesion                                   | -1.94           | 1E-03   | <i>SHC4, LAMA2, ELK1, COMP, CCND1, TNF, ITGB8, FYN, HRAS, MAP2K1, COL27A1, LAMB2, ITGA3, PARVA, MYLPP, MAPK10, COL4A1, COL6A2, COL5A2, COL6A1, ITGA8, COL4A5, GRB2, COL6A6, TLN2, COL6A5, SOS1, MET</i>                                                                    |
| Gap junction                                     | -2.43           | 3E-03   | <i>MAP2K1, HTR2A, ADCY8, GRM1, GNAI2, GRM5, TUBB6, TUBA1A, PLCB4, GNAS, GRB2, SOS1, HRAS, MAP2K5, PRKG1</i>                                                                                                                                                                |
| Axon guidance                                    | -1.91           | 2E-02   | <i>NTNG1, SEMA5A, EPHA5, EPHA8, LIMK1, LRRC4, NTN4, UNC5C, L1CAM, GNAI2, EFNB2, RASA1, PLXNB3, FYN, SRGAP2, HRAS, MET</i>                                                                                                                                                  |
| PI3K-Akt signaling pathway                       | -1.45           | 2E-02   | <i>PHLPP1, LAMA2, ATF6B, EPO, RELA, COMP, CCND1, EIF4EBP1, TNF, ITGB8, HRAS, JAK3, MAP2K1, COL27A1, LAMB2, ITGA3, F2R, NFKB1, KITLG, CDK6, COL4A1, COL6A2, COL5A2, COL6A1, DDIT4, ITGA8, COL4A5, MTCP1, GRB2, COL6A6, COL6A5, PKN1, TEK, SOS1, MET</i>                     |
| MAPK signaling pathway                           | -1.52           | 3E-02   | <i>PPP5D1, ARRB1, ECSIT, RASGRP1, ELK1, RELA, RASGRP3, DUSP10, GNAI2, NTF3, CACNA1S, CD14, HRAS, MAP2K5, MAP2K6, MAP2K3, TGFB2, MAP2K1, MEF2C, DUSP2, MAP3K1, NFKB1, MAPK10, RASA1, GRB2, SOS1, MAP3K14</i>                                                                |
| Pathways in cancer                               | -1.38           | 4E-02   | <i>LAMA2, EPAS1, BRCA2, ADCY8, RASGRP1, RELA, GNAI2, RASGRP3, CCND1, TPR, GNAI2, CTNNA1, VHL, CTNNA2, SKP2, HRAS, APC2, TCF7L2, TGFB2, MAP2K1, TCF7L1, CDKN2A, LAMB2, ITGA3, F2R, STAT3, NFKB1, PML, MAPK10, KITLG, PLCB4, CDK6, COL4A1, GNAS, COL4A5, GRB2, SOS1, MET</i> |
| Insulin secretion                                | -1.85           | 7E-02   | <i>KCNU1, PLCB4, ATF6B, KCNMB2, ATP1A4, GNAS, KCNMB4, KCNN2, CACNA1S, ADCY8, TRPM4</i>                                                                                                                                                                                     |
| Cell cycle                                       | -1.61           | 9E-02   | <i>TGFB2, CDKN2A, BUB1B, TTK, CDC7, SMC1B, CCNA1, CDK6, CCND1, ATM, SKP2, E2F5, BUB1, MAD1L1</i>                                                                                                                                                                           |

Note: Group #5: Uniquely expressed GC-NR HTM cells specific pathways enriched from DEGs of Group #3 minus Group #2; Size: Number of genes enriched.

**Supplementary Table S7:** Comparison of Differentially Expressed Genes in TM Cells Treated with Glucocorticoid from Previous Reports and the Present Study

| Study Design            | Use of Postmortem Tissue | Age of the donors (Yrs) | Number of Donors used | Passage of Cells | Dexamethasone Treatment(nM) | Duration of Exposure (d) | Control medium                              | History of glaucoma    | Microarray/RNA Seq                                         | List of Up-regulated genes                                                                                     | References |
|-------------------------|--------------------------|-------------------------|-----------------------|------------------|-----------------------------|--------------------------|---------------------------------------------|------------------------|------------------------------------------------------------|----------------------------------------------------------------------------------------------------------------|------------|
| Human Cultured TM cells | yes                      | 7,16,21 and 28          | 4                     | 4-5              | 100                         | 7                        | 0.1% Ethanol                                | Not specified          | cDNA                                                       | <i>RGC32, OCA2, ANGPTL7, MYOC, FKBP5, SAA1, ZBTB16</i>                                                         | #7         |
| Human Cultured TM cells | Yes                      | unknown                 | 2                     | 4-6              | 100                         | 10                       | 0.1% Ethanol                                | No history of glaucoma | Affymetrix Human Genome U95Av2 gene Chip microarrays       | <i>SERPINA3, AKR1C1, IGFBP2, MYOC, PEDF, PCOLCE, AKR1C3, PTGDS, CHI3L1, ACTG2, CDT6, ASS, CTP, APOD, AP1G1</i> | #8         |
| Human Cultured TM cells |                          | unknown                 |                       | 8                | 100                         | 10                       | Water in DMEM medium                        | Not specified          | MicroMax Human cDNA System I                               | <i>GAS1, CDH4, MT1L, CST3, TSC22, LDHA, IGFbp2, TAGLN</i>                                                      | #9         |
| Human Cultured TM cells | Yes                      | 12,16 and 17            | 3                     | 5                | 100                         | 21                       | DMEM medium containing 10% fetal calf serum | No history of glaucoma | Affymetrix Human Genome U133A array                        | <i>MYOC, DCN, IGFBP2</i>                                                                                       | #10        |
| Human Cultured TM cells | Yes                      | 52                      | 1                     | 8                | 100                         | 7                        | 0.0025% and 0.025% Benzyl alcohol           | No history of glaucoma | Standford Human cDNA SHEW                                  | <i>GAS1, CDH4, MT1L, CST3, ATF4, ASNS/TS11, CHOP, HSPA5</i>                                                    | #11        |
| Human Cultured TM cells | Yes                      | 3 months old and 35     | 2                     | 3-6              | 1000                        | 24h                      | 0.1% DMSO                                   | Not specified          | Agilent-014850 whole Human Genome Microarray 4X44K G4112F  | <i>RGC32, OCA2, SAA1, ANGPTL7, ITGA10, LSP1, KCNB1, FKBP5, KLF15, ANGPTL4, MYOC, ZBTB16, PF4</i>               | #12        |
| Human Cultured TM cells | Yes                      | Not specified           | 3                     | Not specified    | 100                         | 14                       | DMEM with 10% fetal calf serum              | Not specified          | Agilent - 028004 SurePrint G3 Human Gene Expression 8X60 K | <i>FKBP5, ZBTB16, SCNNIA, SAA1</i>                                                                             | #13        |

|                                                                                                        |                          |            |                              |     |     |   |                 |                           |                                                |                                                                                                                                           |               |
|--------------------------------------------------------------------------------------------------------|--------------------------|------------|------------------------------|-----|-----|---|-----------------|---------------------------|------------------------------------------------|-------------------------------------------------------------------------------------------------------------------------------------------|---------------|
|                                                                                                        |                          |            |                              |     |     |   |                 |                           |                                                | Microarray<br>039381                                                                                                                      |               |
| Human<br>Cultured TM<br>cells                                                                          | Yes                      | 27         | 1                            | 2   | 500 | 6 | 0.1%<br>ethanol | Not specified             | Affymetrix<br>Human Gene<br>1.0 ST Array       | <i>ITGB3, CHN1,<br/>PIK3R1, MFGE8</i>                                                                                                     | #14           |
| Bovine –<br>Perfusion organ<br>culture system<br>-BTM cells with<br>known GC<br>responsiveness<br>used | Yes-Bovine<br>donor eyes | Adult cows | 6 donors<br>(paired<br>eyes) | >3  | 100 | 7 | 0.1%<br>ethanol | Not specified             | Illumina<br>Human<br>Methylation<br>450K Chips | <i>DKK1, HMGA2,<br/>SOD2, STEAP4,<br/>SLC7A8</i>                                                                                          | #16           |
| Human –<br>Perfusion organ<br>culture system<br>-HTM cells<br>with known GC<br>responsiveness          | Yes                      | 67 (mean)  | 8 donors                     | 3-4 | 100 | 7 | 0.1%<br>Ethanol | No history of<br>glaucoma | Illumina Next<br>Seq 500                       | <i>ZBTB16, SAA1,<br/>MYOC, OCA2, H19,<br/>APOD, SAA2,<br/>HIF3A, PRODH,<br/>FKBP5, LSP1,<br/>ANGPTL7, CPM.<br/>STEAP4, MT2A,<br/>IRF7</i> | Present Study |

**Supplementary Table S8a.** Comparison of Pathways Involved in DEX treated TM Cells from Previous Reports and the Present Study

| <b>Effect of DEX on TM cells</b>   |                           | <b>Present Study</b>                             |
|------------------------------------|---------------------------|--------------------------------------------------|
| <b>Human Studies<br/>Combined*</b> | <b>Bovine<sup>†</sup></b> |                                                  |
| Collagen                           | Collagen                  | -                                                |
| ECM                                | ECM                       | -                                                |
| Adhesion                           | Adhesion                  | Adhesion                                         |
| WNT signaling                      | WNT signaling             | WNT signaling                                    |
| Inflammation                       | Inflammation              | -                                                |
| Adipogenesis                       | Adipogenesis              | -                                                |
| Glucose metabolism                 | Glucose metabolism        | -                                                |
| NF-κB                              | NF-κB                     | -                                                |
| Apoptosis                          | Apoptosis                 | -                                                |
| GPCR                               | GPCR                      | -                                                |
| Oxidative stress                   | Oxidative stress          | -                                                |
|                                    |                           | Phosphatidylinositol signaling system            |
|                                    |                           | TGF Beta Signaling Pathway                       |
|                                    |                           | P53 Signaling Pathway                            |
|                                    |                           | mTOR signaling pathway                           |
|                                    |                           | Cell cycle                                       |
|                                    |                           | Adherens junction                                |
|                                    |                           | Regulation of Actin Cytoskeleton                 |
|                                    |                           | TNF signaling pathway                            |
|                                    |                           | MAPK Signaling Pathway                           |
|                                    |                           | Pathways in Cancer                               |
|                                    |                           | PI3K-Akt signaling pathway                       |
|                                    |                           | Cell Adhesion Molecules Cams                     |
|                                    |                           | Calcium signaling pathway                        |
|                                    |                           | Axon Guidance                                    |
|                                    |                           | Inflammatory mediator regulation of TRP channels |

|                                    |
|------------------------------------|
| ECM-receptor interaction           |
| cAMP signaling pathway             |
| Ras signaling pathway              |
| Steroid biosynthesis               |
| Vascular smooth muscle contraction |
| VEGF Signaling Pathway             |
| ABC transporters                   |
| Notch signaling pathway            |
| Gap junction                       |
| cGMP-PKG signaling pathway         |

**Note:** \**Ref. No.7-14*, <sup>†</sup>Ref.No.16, 35.

**Supplementary Table S8b.** Comparison of Pathways Enriched in Responder and Non-Responder HTM Cells from Previous Report and the Present Study.

| Responder vs. non-responders Bovine<br>† | Present Study                               |                                                  |
|------------------------------------------|---------------------------------------------|--------------------------------------------------|
|                                          | Responder                                   | Non-Responder                                    |
| Collagen                                 | -                                           |                                                  |
| ECM                                      | -                                           |                                                  |
| Adhesion                                 | Adhesion                                    |                                                  |
| WNT signaling                            | WNT signaling                               |                                                  |
| Inflammation                             | -                                           |                                                  |
| Adipogenesis                             | -                                           |                                                  |
| Glucose metabolism                       | -                                           |                                                  |
| NF-κB                                    | -                                           |                                                  |
| Apoptosis                                | -                                           |                                                  |
| Cell cycle                               | Cell cycle                                  |                                                  |
| Senescence                               | -                                           |                                                  |
| Oxidative stress                         | -                                           |                                                  |
|                                          | Axon guidance                               | Long-term depression                             |
|                                          | Regulation of actin cytoskeleton            | Vascular smooth muscle contraction               |
|                                          | ECM receptor interaction                    | Inflammatory mediator regulation of TRP channels |
|                                          | Focal adhesion                              | Fatty acid metabolism                            |
|                                          | PI3K-Akt signaling pathway                  | VEGF signaling pathway                           |
|                                          | Adherens junction                           | Oxytocin signaling pathway                       |
|                                          | Protein processing in endoplasmic reticulum | Calcium signaling pathway                        |
|                                          | T cell receptor signaling pathway           | ECM-receptor interaction                         |
|                                          | Calcium signaling pathway                   | Focal adhesion                                   |
|                                          | Cell adhesion molecules (CAMs)              | Gap junction                                     |
|                                          | B cell receptor signaling pathway           | Axon guidance                                    |

|                             |                            |
|-----------------------------|----------------------------|
| TNF signaling pathway       | PI3K-Akt signaling pathway |
| Chemokine signaling pathway | MAPK signaling pathway     |
|                             | Pathways in cancer         |
|                             | Insulin secretion          |
|                             | Cell cycle                 |

**Note:** <sup>‡</sup> Ref. No.16, 35
